# Supplementary material for: Polyoxa- and Polyazamacrocycles Incorporating 6,7-Diaminoquinoxaline Moiety: Synthesis and Application as Tunable Optical pH-Indicators in Aqueous Solution
Source: MDPI journal article supplement (doi:10.3390/molecules28020512), 2023-01-04
Supplement: s1 [file s1]

**Supporting information**  
for the article

**Polyoxa- and Polyazamacrocycles Incorporating 6,7-  
diaminoquinoxaline Moiety: Synthesis and Application as  
Tunable Optical pH-Indicators in Aqueous Solution**

by  
Igor A. Kurashov, Alisa D. Kharlamova, Anton S. Abel,  
Alexei D. Averin, and Irina P. Beletskaya

## Table of content

|                                                                                          |     |
|------------------------------------------------------------------------------------------|-----|
| 1. Spectroscopic studies of <b>3</b> , <b>5c</b> and <b>5e</b> in organic solutions..... | S3  |
| 2. Spectroscopic studies of <b>3</b> , <b>5c</b> and <b>5e</b> in aqueous solutions..... | S6  |
| 3. Studies of <b>3</b> and <b>5a-d</b> for metal cations binding in acetonitrile.....    | S9  |
| 4. Protonation studies of <b>5c</b> and <b>5e</b> .....                                  | S19 |
| 5. NMR spectra of new compounds.....                                                     | S24 |
| 6. References.....                                                                       | S36 |

# 1.Spectroscopic Studies of 3, 5c and 5e in Organic Solvents.

**Table S1.** Photophysical data for compounds 3, 5c and 5e in various solvents

| Compound | Solvent                                | $\lambda_{\text{abs}}, \text{nm}$<br>( $\log \epsilon$ ) <sup>a</sup> | $\lambda_{\text{em}}, \text{nm}$ | $\Phi, \%$ <sup>b</sup> | Brightness,<br>B,<br>$\text{M}^{-1} \text{cm}^{-1} \text{c}$ |
|----------|----------------------------------------|-----------------------------------------------------------------------|----------------------------------|-------------------------|--------------------------------------------------------------|
| 3        | toluene                                | 400 (4.35)                                                            | 453                              | 34                      | 7597                                                         |
|          | dioxane                                | 258 (4.49)                                                            | 450                              | 53                      | 12261                                                        |
|          |                                        | 281 (4.47)                                                            |                                  |                         |                                                              |
|          |                                        | 404 (4.36)                                                            |                                  |                         |                                                              |
|          | CH <sub>2</sub> Cl <sub>2</sub>        | 402 (4.25)                                                            | 465                              | 52                      | 9296                                                         |
|          | MeCN                                   | 261 (4.51)                                                            | 465                              | 59                      | 13494                                                        |
|          |                                        | 279 (4.50)                                                            |                                  |                         |                                                              |
|          |                                        | 404 (4.36)                                                            |                                  |                         |                                                              |
|          | MeOH                                   | 261 (4.62)                                                            | 482                              | 48                      | 10978                                                        |
|          |                                        | 279 (4.53)                                                            |                                  |                         |                                                              |
|          |                                        | 416 (4.36)                                                            |                                  |                         |                                                              |
|          | H <sub>2</sub> O (pH = 6) <sup>c</sup> | 256 (4.22)                                                            | 507                              | 27                      | 3132                                                         |
|          |                                        | 277 (4.18)                                                            |                                  |                         |                                                              |
|          |                                        | 412 (4.06)                                                            |                                  |                         |                                                              |
| 5c       | toluene                                | 408 (4.29)                                                            | 450                              | 50                      | 12492                                                        |
|          | dioxane                                | 261 (4.24)                                                            | 451                              | 70                      | 12125                                                        |
|          |                                        | 283 (4.22)                                                            |                                  |                         |                                                              |
|          |                                        | 408 (4.14)                                                            |                                  |                         |                                                              |
|          | CH <sub>2</sub> Cl <sub>2</sub>        | 410 (4.14)                                                            | 462                              | 59                      | 10220                                                        |
|          | MeCN                                   | 262 (4.38)                                                            | 465                              | 44                      | 9674                                                         |
|          |                                        | 282 (4.35)                                                            |                                  |                         |                                                              |
|          |                                        | 409 (4.24)                                                            |                                  |                         |                                                              |
|          | MeOH                                   | 261 (4.45)                                                            | 486                              | 64                      | 11726                                                        |
|          |                                        | 279 (4.39)                                                            |                                  |                         |                                                              |
|          |                                        | 420 (4.16)                                                            |                                  |                         |                                                              |
|          | H <sub>2</sub> O (pH = 6) <sup>c</sup> | 256 (4.19)                                                            | 510                              | 34                      | 3944                                                         |
|          |                                        | 277 (4.14)                                                            |                                  |                         |                                                              |
|          |                                        | 418 (4.06)                                                            |                                  |                         |                                                              |
| 5e       | toluene                                | 416 (4.30)                                                            | 452                              | 42                      | 8355                                                         |
|          | dioxane                                | 262 (4.31)                                                            | 456                              | 33                      | 4837                                                         |
|          |                                        | 283 (4.30)                                                            |                                  |                         |                                                              |
|          |                                        | 411 (4.17)                                                            |                                  |                         |                                                              |
|          | CH <sub>2</sub> Cl <sub>2</sub>        | 405 (3.94)                                                            | 476                              | 42                      | 3628                                                         |
|          | MeCN                                   | 257 (4.39)                                                            | 480                              | 44                      | 6795                                                         |
|          |                                        | 278 (4.36)                                                            |                                  |                         |                                                              |
|          |                                        | 400 (4.19)                                                            |                                  |                         |                                                              |
|          | MeOH                                   | 256 (4.39)                                                            | 498                              | 60                      | 9423                                                         |
|          |                                        | 279 (4.34)                                                            |                                  |                         |                                                              |

|                                        |            |     |    |      |
|----------------------------------------|------------|-----|----|------|
|                                        | 412 (4.20) |     |    |      |
| H <sub>2</sub> O (pH = 6) <sup>c</sup> | 256 (4.38) | 526 | 36 | 5148 |
|                                        | 277 (4.33) |     |    |      |
|                                        | 407 (4.15) |     |    |      |

<sup>a</sup>Molar extinction coefficient ( $\epsilon$ ) is expressed in M<sup>-1</sup> cm<sup>-1</sup>. <sup>b</sup> Quantum yields were determined using quinine sulfate in 0.05M H<sub>2</sub>SO<sub>4</sub> ( $\Phi$  = 53%) as a standard. <sup>c</sup>  $B = \Phi(\lambda) \times \epsilon(\lambda_{ex})$ . [1], the lowest absorption band (ICT) was used for the calculation. <sup>c</sup> 1 vol% MeOH in H<sub>2</sub>O.

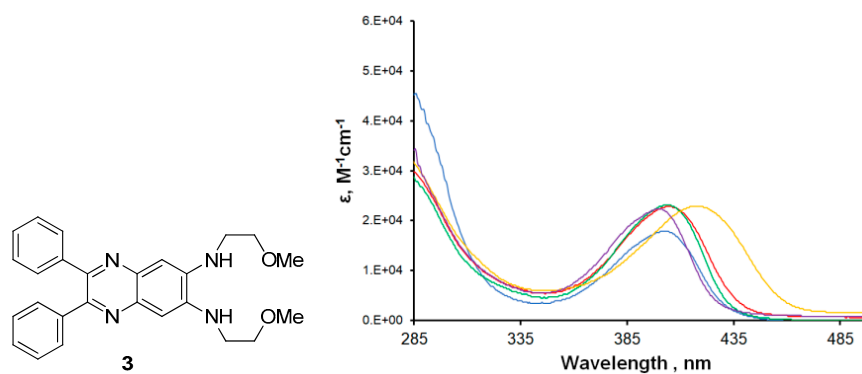

**Figure S1.** UV-vis spectra of **3** in toluene (violet), dioxane (green), CH<sub>2</sub>Cl<sub>2</sub> (blue), MeCN (red) and MeOH (yellow).

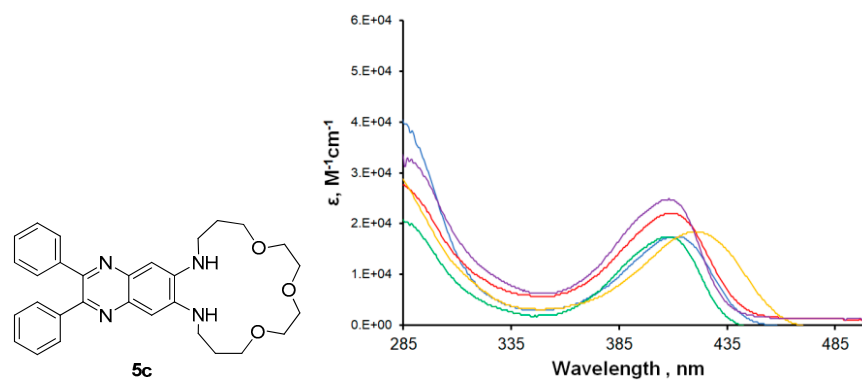

**Figure S2.** UV-vis spectra of **5c** in toluene (violet), dioxane (green), CH<sub>2</sub>Cl<sub>2</sub> (blue), MeCN (red) and MeOH (yellow).

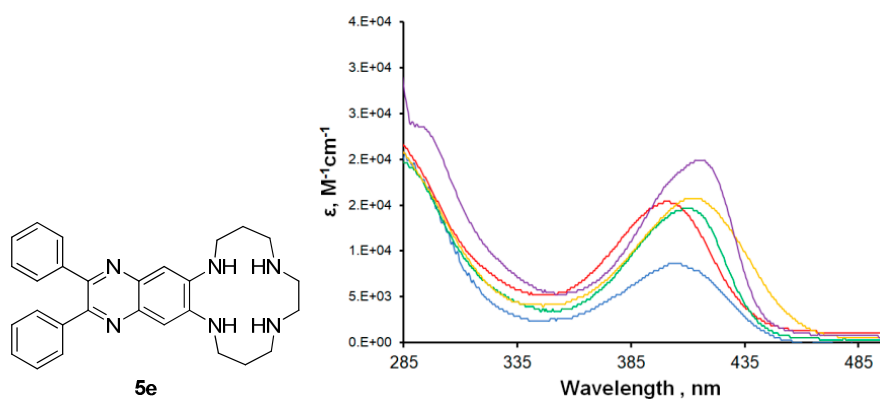

**Figure S3.** UV-vis spectra of **5e** in toluene (violet), dioxane (green), CH<sub>2</sub>Cl<sub>2</sub> (blue), MeCN (red) and MeOH (yellow).

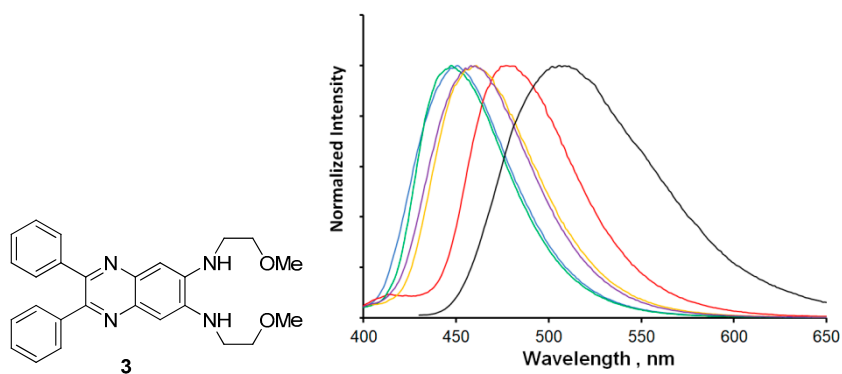

**Figure S4.** Normalized fluorescence spectra of **3** ( $\lambda_{\text{ex}} = 420$  nm) in toluene (blue), dioxane (green),  $\text{CH}_2\text{Cl}_2$  (violet), MeCN (yellow), MeOH (red), water (1 vol% MeOH, pH = 6, black).

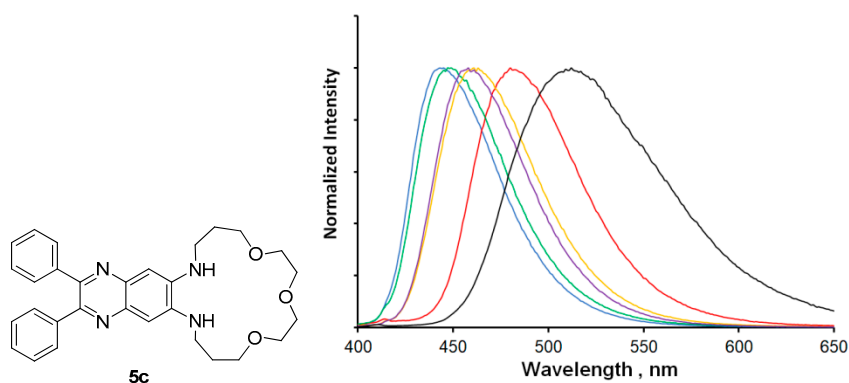

**Figure S5.** Normalized fluorescence spectra of **5c** ( $\lambda_{\text{ex}} = 420$  nm) in toluene (blue), dioxane (green),  $\text{CH}_2\text{Cl}_2$  (violet), MeCN (yellow), MeOH (red), water (1 vol% MeOH, pH = 6, black).

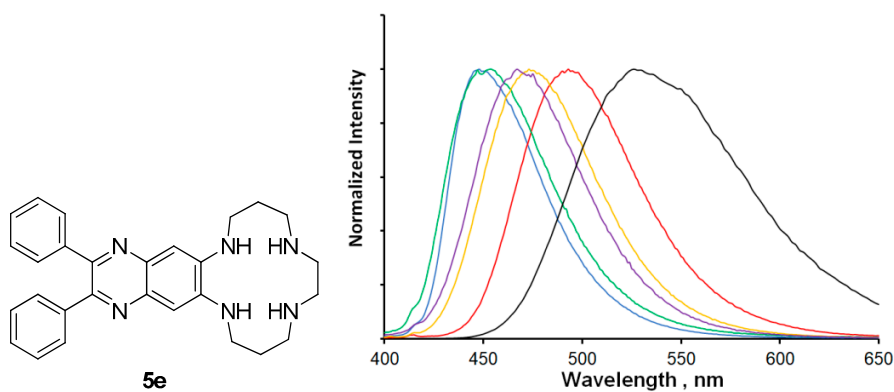

**Figure S6.** Normalized fluorescence spectra of **5c** ( $\lambda_{\text{ex}} = 420$  nm) in toluene (blue), dioxane (green),  $\text{CH}_2\text{Cl}_2$  (violet), MeCN (yellow), MeOH (red), water (pH = 6, black). The spectrum in water corresponds  $[\mathbf{5eH}]^+$ .

## 2. Spectroscopic studies of **3**, **5c** and **5e** in aqueous solutions

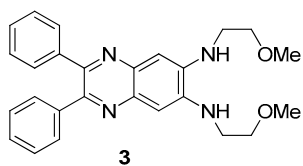

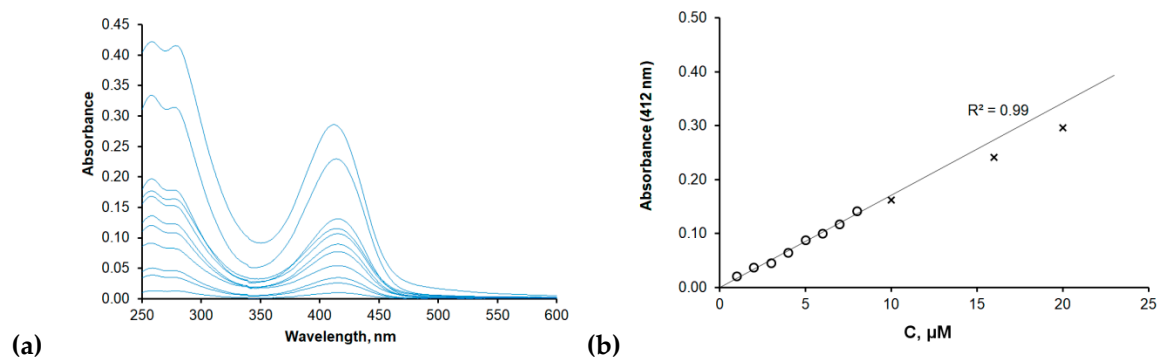

**Figure S7.** (a) UV-vis spectra of **3** in aqueous solutions (1% MeOH, pH = 6). (b) Dependence of the absorbance intensity on **3** concentration in aqueous solutions (1 vol% MeOH, pH = 6).

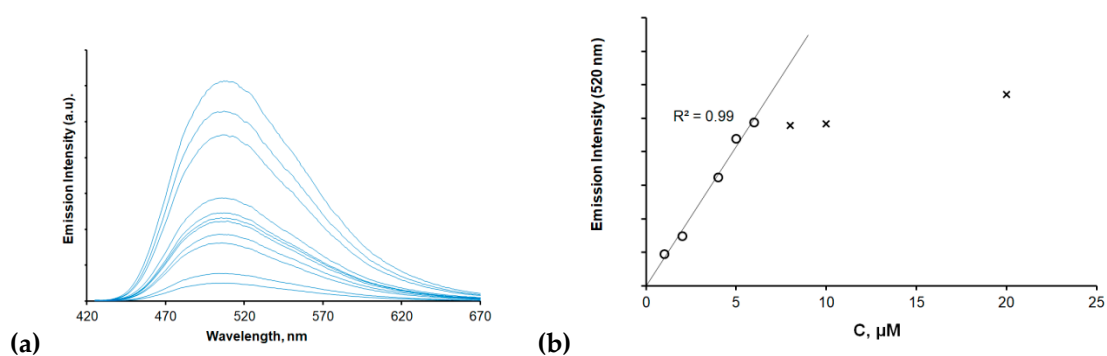

**Figure S8.** (a) Fluorescence spectra of **3** in aqueous solutions (1 vol % MeOH, pH = 6,  $\lambda_{\text{ex}} = 415$  nm). (b) Dependence of the emission intensity on **3** concentration in aqueous solutions (1 vol % MeOH, pH = 6,  $\lambda_{\text{ex}} = 415$  nm).

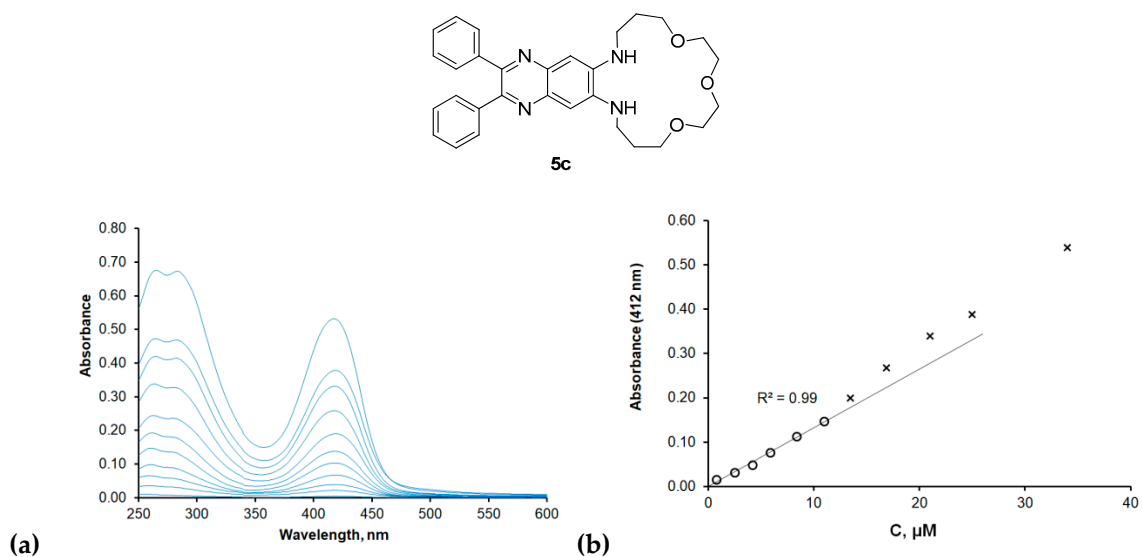

**Figure S9.** (a) UV-vis spectra of **5c** in aqueous solutions (1 vol % MeOH, pH = 6). (b) Dependence of the absorbance intensity on **5c** concentration in aqueous solutions (1 vol % MeOH, pH = 6).

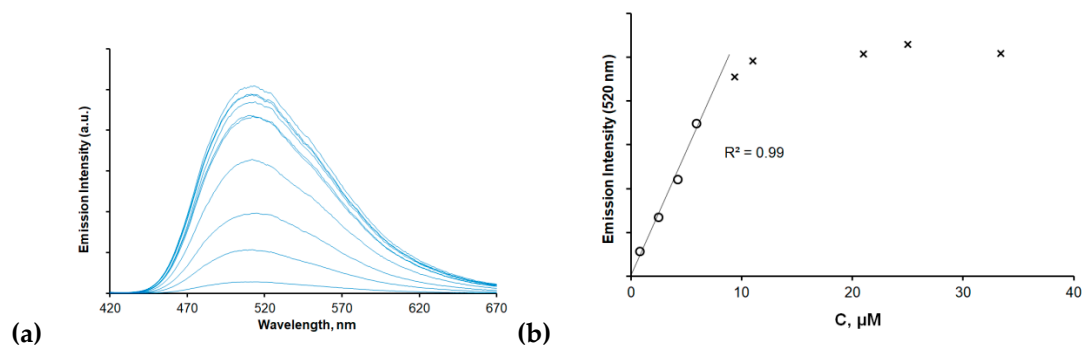

**Figure S10.** (a) Fluorescence spectra of **5c** in aqueous solutions (1 vol% MeOH, pH = 6,  $\lambda_{\text{ex}} = 415 \text{ nm}$ ). (b) Dependence of the emission intensity on **5c** concentration in aqueous solutions (1 vol% MeOH, pH = 6,  $\lambda_{\text{ex}} = 415 \text{ nm}$ ).



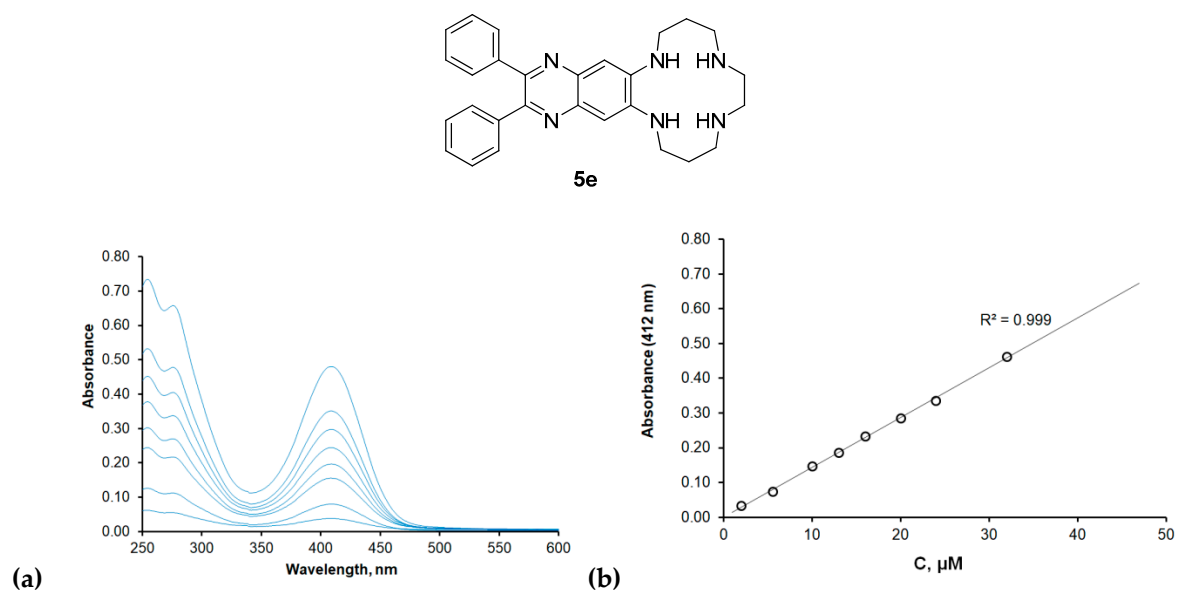

**Figure S11.** (a) UV-vis spectra of **5e** in aqueous solutions (pH = 6). (b) Dependence of the absorbance intensity on **5e** concentration in aqueous solutions (pH = 6).

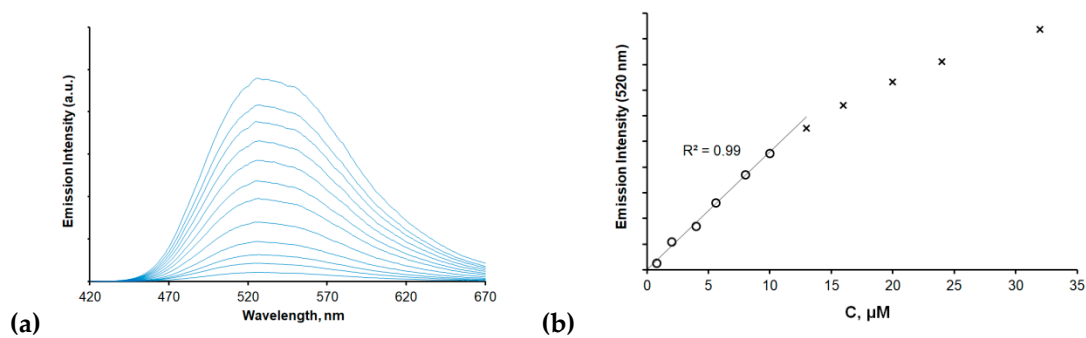

**Figure S12.** (a) Fluorescence spectra of **5e** in aqueous solutions (pH = 6,  $\lambda_{\text{ex}} = 415$  nm). (b) Dependence of the emission intensity on **5e** concentration in aqueous solutions (pH = 6,  $\lambda_{\text{ex}} = 415$  nm).

### 3. Studies of **3** and **5a-d** for Metal Cations Binding in Acetonitrile.

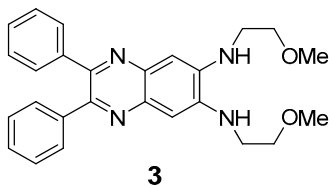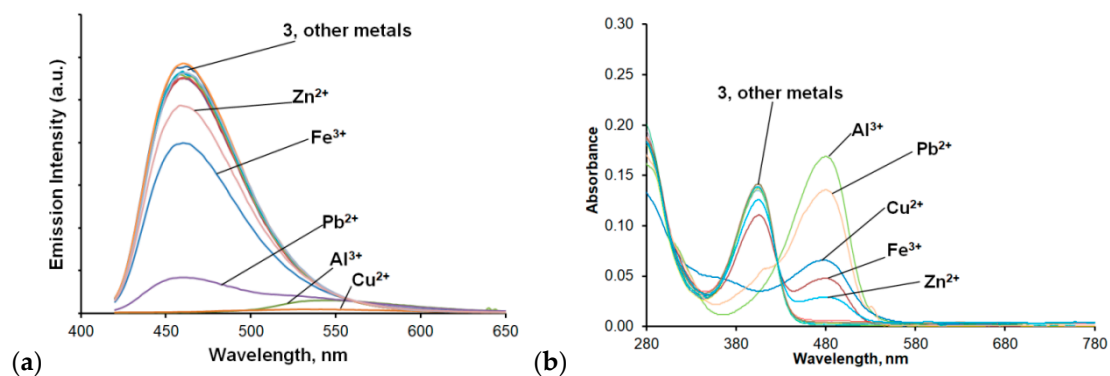

**Figure S13.** Luminescence (a) and absorption (b) spectra of **3** in acetonitrile ( $[\mathbf{3}] = 6.0 \mu\text{M}$ ,  $\lambda_{\text{ex}} = 405 \text{ nm}$ ) before and after addition of 5 equiv. of metal perchlorate salts.

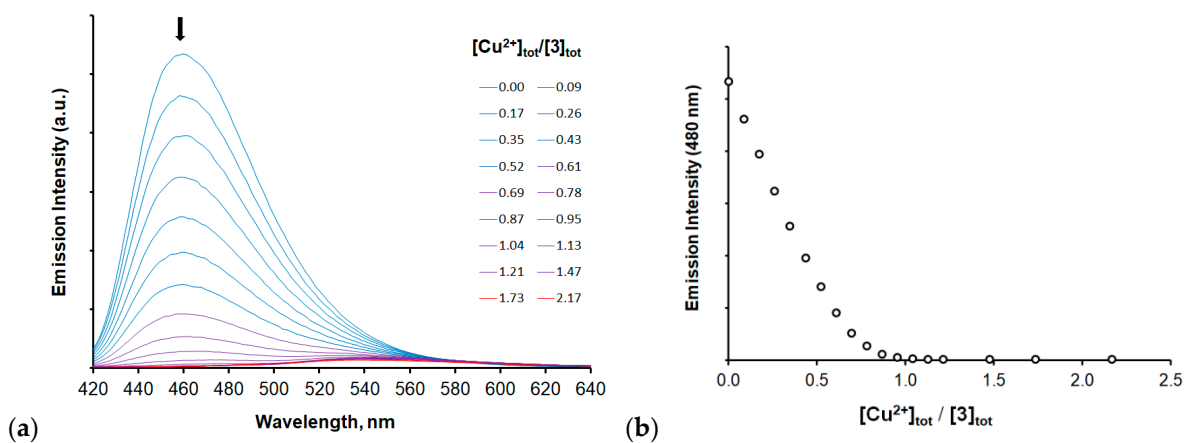

**Figure S14.** (a) Evolution of the emission spectrum of **3** in acetonitrile ( $[\mathbf{3}]_{\text{tot}} = 6.0 \mu\text{M}$ ,  $\lambda_{\text{ex}} = 405 \text{ nm}$ ) upon addition of  $\text{Cu}(\text{ClO}_4)_2$  (0–2.1 equiv.). (b) Changes of the emission intensity as a function of the  $[\text{Cu}^{2+}]_{\text{tot}}/[\mathbf{3}]_{\text{tot}}$  ratio at  $\lambda_{\text{em}} = 480 \text{ nm}$ .

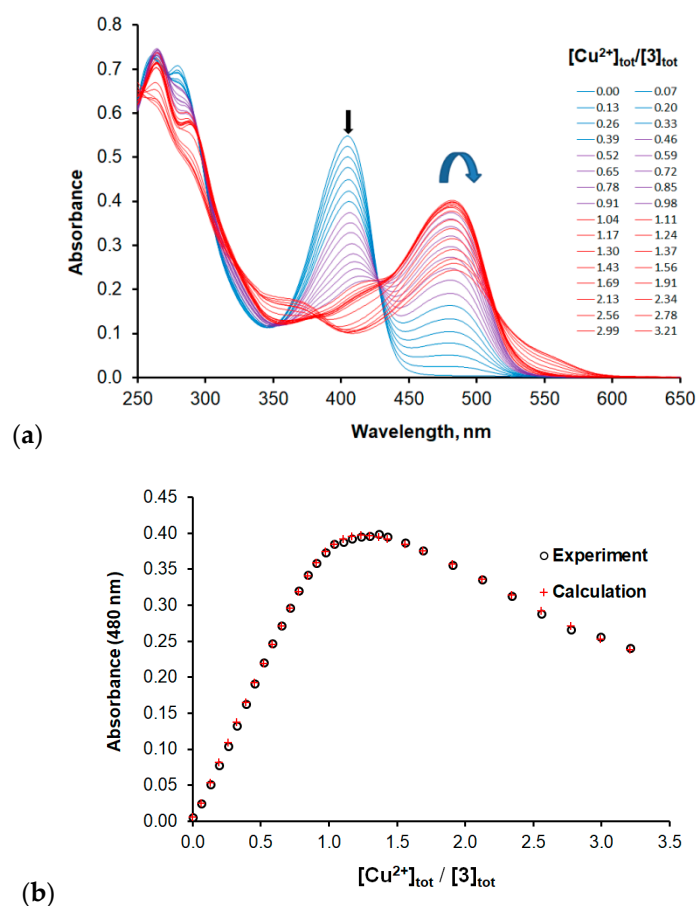

**Figure S15.** Evolution of the UV-vis absorption spectrum of **3** in acetonitrile ( $[3] = 23.9 \mu\text{M}$ ) upon addition of  $\text{Cu}(\text{ClO}_4)_2$  (0–3.2 equiv.). Changes of the absorbance as a function of the  $[\text{Cu}^{2+}]_{\text{tot}}/[\text{3}]_{\text{tot}}$  ratio at  $\lambda = 480 \text{ nm}$ .

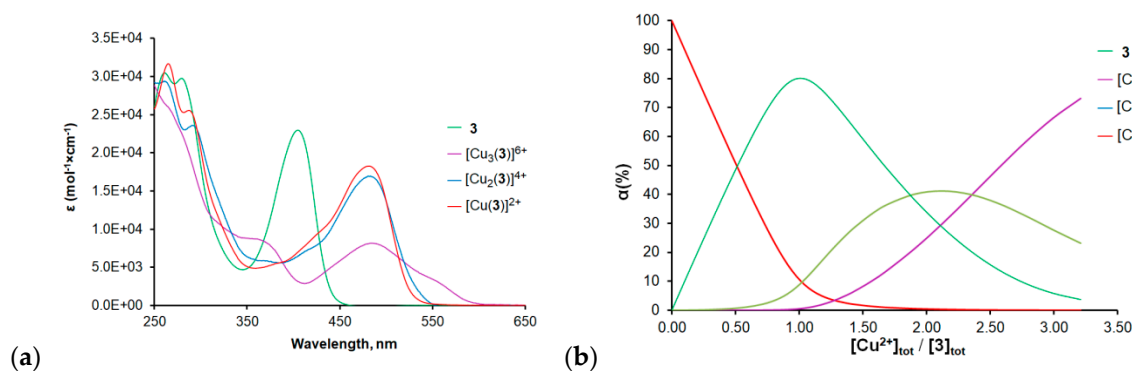

**Figure S16.** UV-vis spectra of **3**,  $[\text{Cu}(\text{3})]^{2+}$ ,  $[\text{Cu}_2(\text{3})]^{4+}$  and  $[\text{Cu}_3(\text{3})]^{6+}$  in acetonitrile calculated using HypSpec program.[2] (b) Species distribution diagram for the **3**/ $\text{Cu}^{2+}$  system in acetonitrile calculated using HypSpec program.[2] Data were fit with HypSpec using the following model:

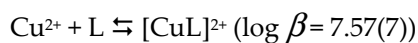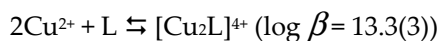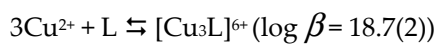

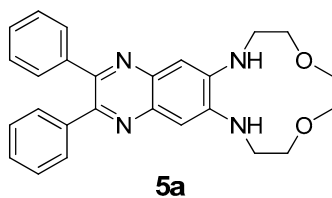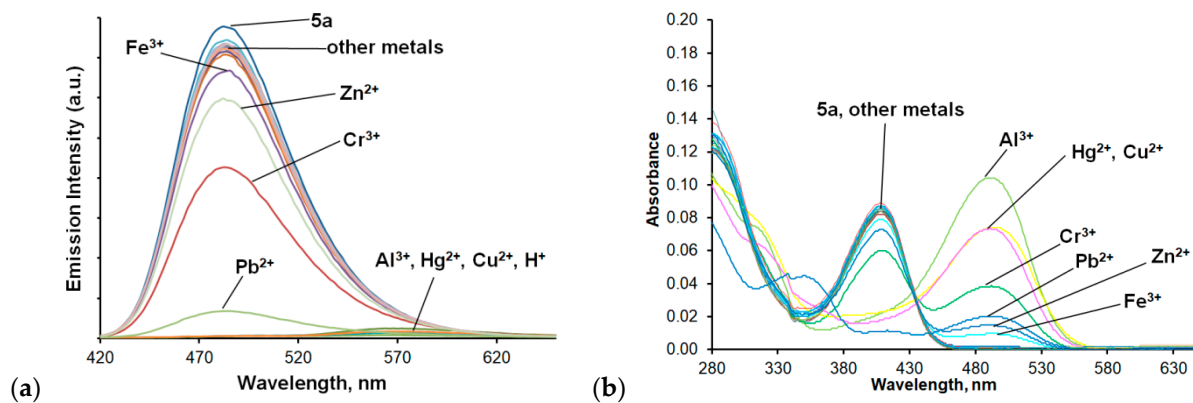

**Figure S17.** Luminescence (a) and absorption (b) spectra of **5a** in acetonitrile ( $[\mathbf{5a}] = 5.2 \mu\text{M}$ ,  $\lambda_{\text{ex}} = 408 \text{ nm}$ ) before and after addition of 5 equiv. of metal perchlorate salts.

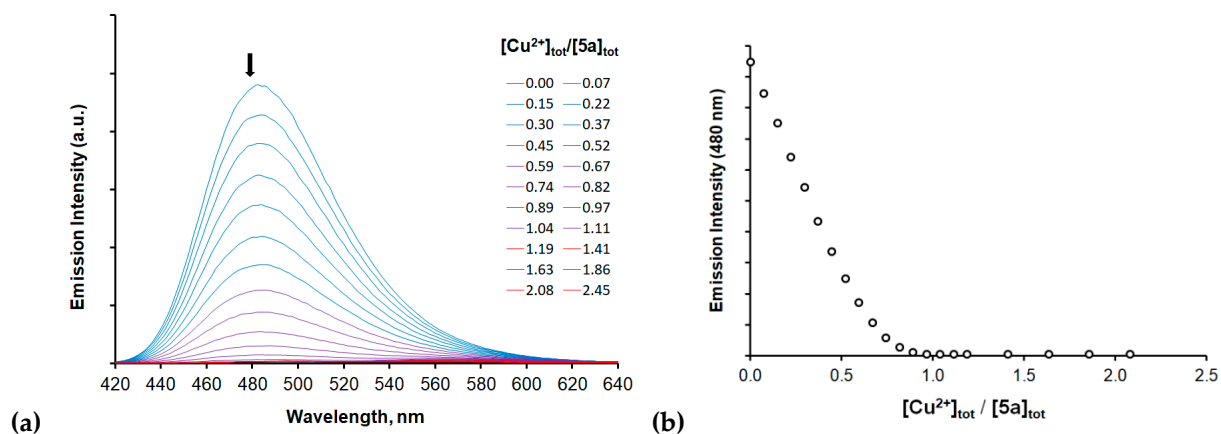

**Figure S18.** (a) Evolution of the emission spectrum of **5a** in acetonitrile ( $[\mathbf{5a}]_{\text{tot}} = 5.2 \mu\text{M}$ ,  $\lambda_{\text{ex}} = 408 \text{ nm}$ ) upon addition of  $\text{Cu}(\text{ClO}_4)_2$  (0–2.4 equiv.). (b) Changes of the emission intensity as a function of the  $[\text{Cu}^{2+}]_{\text{tot}}/[\mathbf{5a}]_{\text{tot}}$  ratio at  $\lambda_{\text{em}} = 480 \text{ nm}$ .

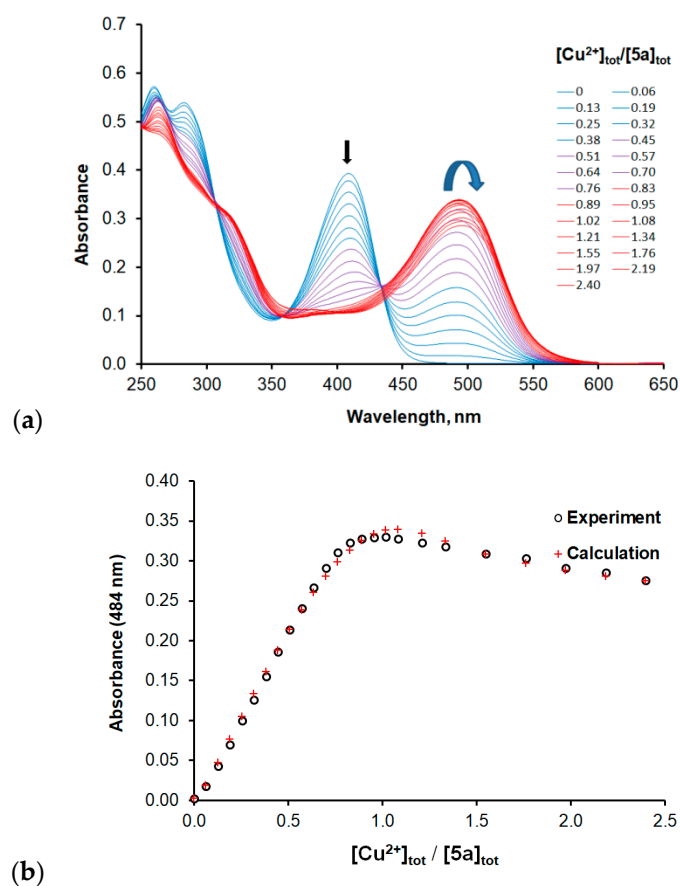

**Figure S19.** (a) Evolution of the UV-vis absorption spectrum of **5a** in acetonitrile ( $[5a] = 24.4 \mu\text{M}$ ) upon addition of  $\text{Cu}(\text{ClO}_4)_2$  (0–2.4 equiv.). (b) Changes of the absorbance as a function of the  $[\text{Cu}^{2+}]_{\text{tot}}/[\text{5a}]_{\text{tot}}$  ratio at  $\lambda = 484 \text{ nm}$ .

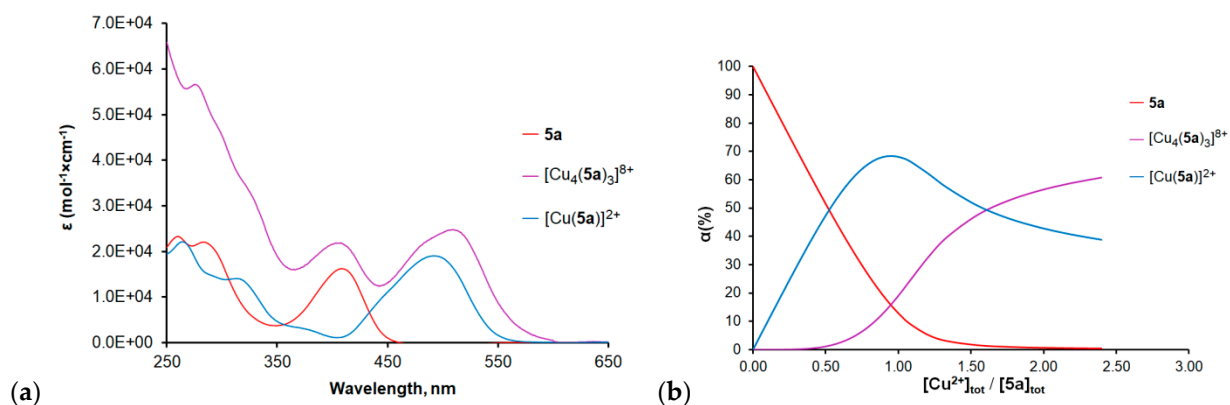

**Figure S20.** (a) UV-vis spectra of **5a**,  $[\text{Cu}(\text{5a})]^{2+}$  and  $[\text{Cu}_4(\text{5a})_3]^{8+}$  in acetonitrile calculated using HypSpec program.[2] (b) Species distribution diagram for the **5a**/ $\text{Cu}^{2+}$  system in acetonitrile calculated using HypSpec program.[2] Data were fit with HypSpec using the following model:

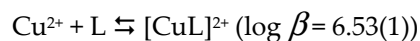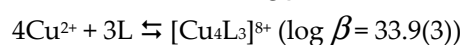

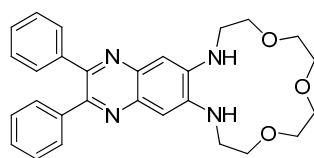

**5b**

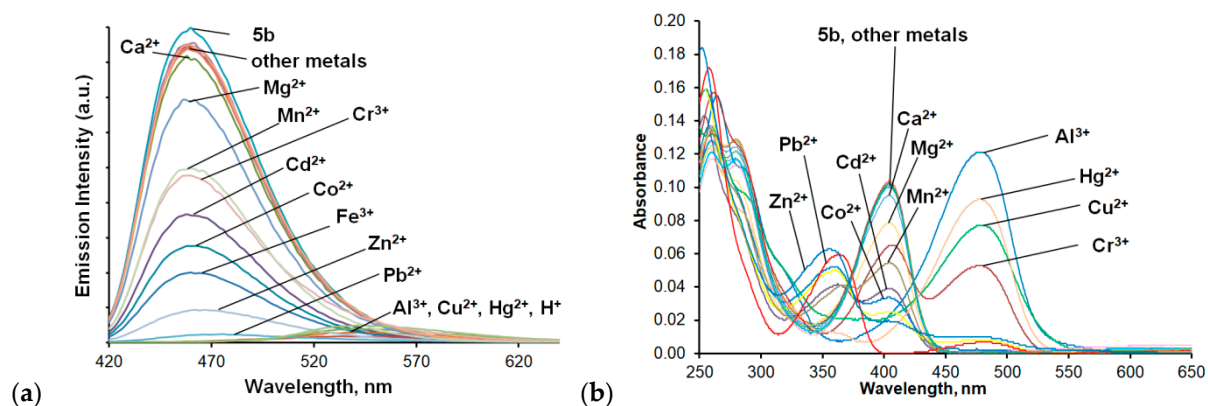

**Figure S21.** Luminescence (a) and absorption (b) spectra of **5b** in acetonitrile ( $[\mathbf{5b}] = 4.8 \mu\text{M}$ ,  $\lambda_{\text{ex}} = 404 \text{ nm}$ ) before and after addition of 5 equiv. of metal perchlorate salts.

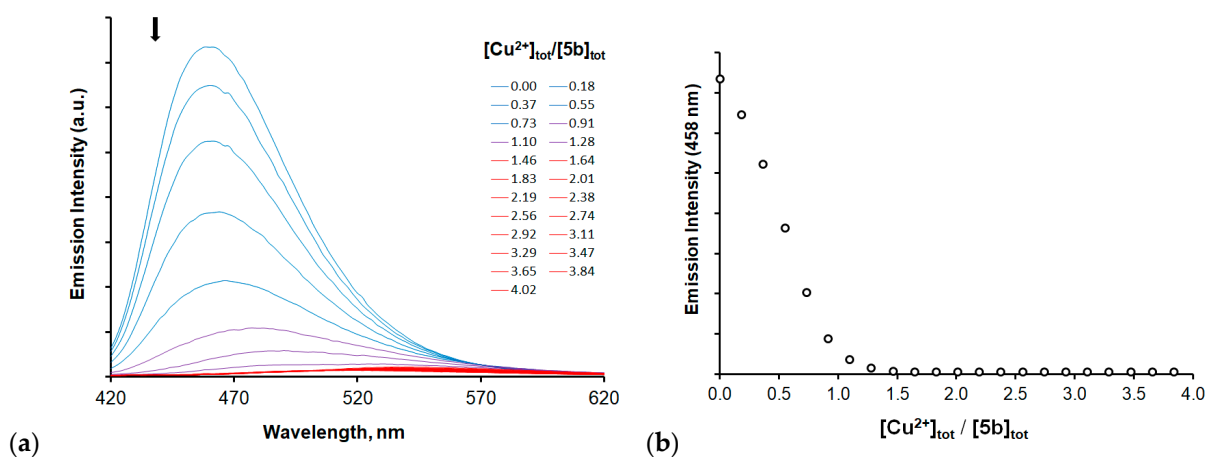

**Figure S22.** (a) Evolution of the emission spectrum of **5b** in acetonitrile ( $[\mathbf{5b}]_{\text{tot}} = 4.8 \mu\text{M}$ ,  $\lambda_{\text{ex}} = 404 \text{ nm}$ ) upon addition of  $\text{Cu}(\text{ClO}_4)_2$  (0–4 equiv.). (b) Changes of the emission intensity as a function of the  $[\text{Cu}^{2+}]_{\text{tot}}/[\mathbf{5b}]_{\text{tot}}$  ratio at  $\lambda_{\text{em}} = 458 \text{ nm}$ .

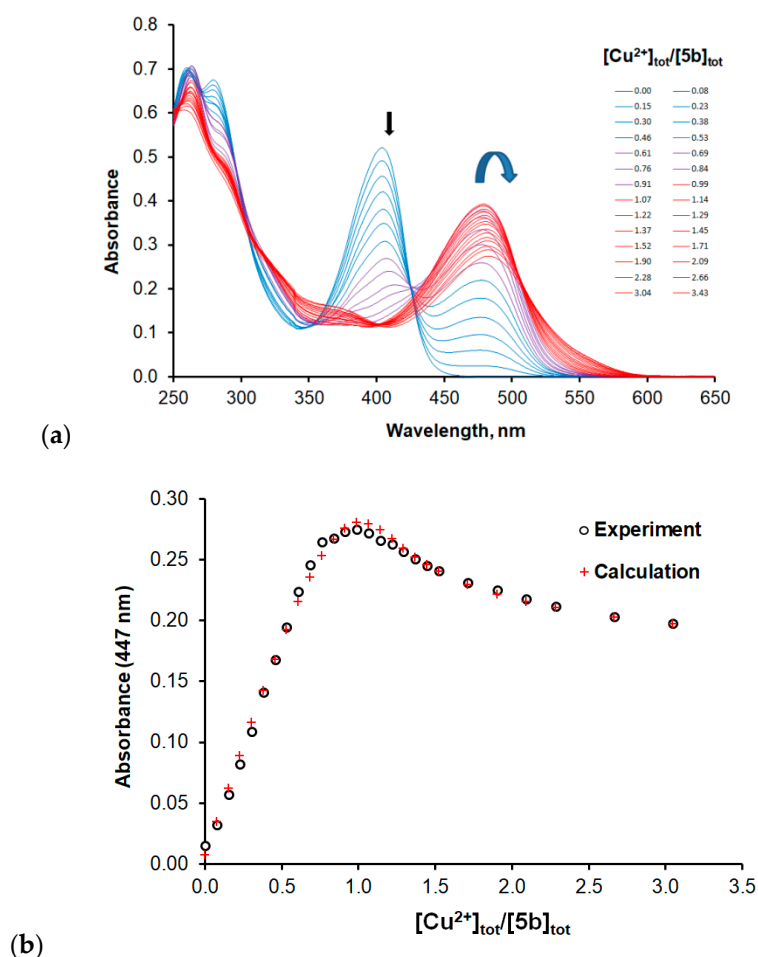

**Figure S23.** (a) Evolution of the UV-vis absorption spectrum of **5b** in acetonitrile ( $[5b] = 23.3 \mu M$ ) upon addition of  $Cu(ClO_4)_2$  (0–3 equiv.). (b) Changes of the absorbance as a function of the  $[Cu^{2+}]_{tot}/[5b]_{tot}$  ratio at  $\lambda = 447 \text{ nm}$ .

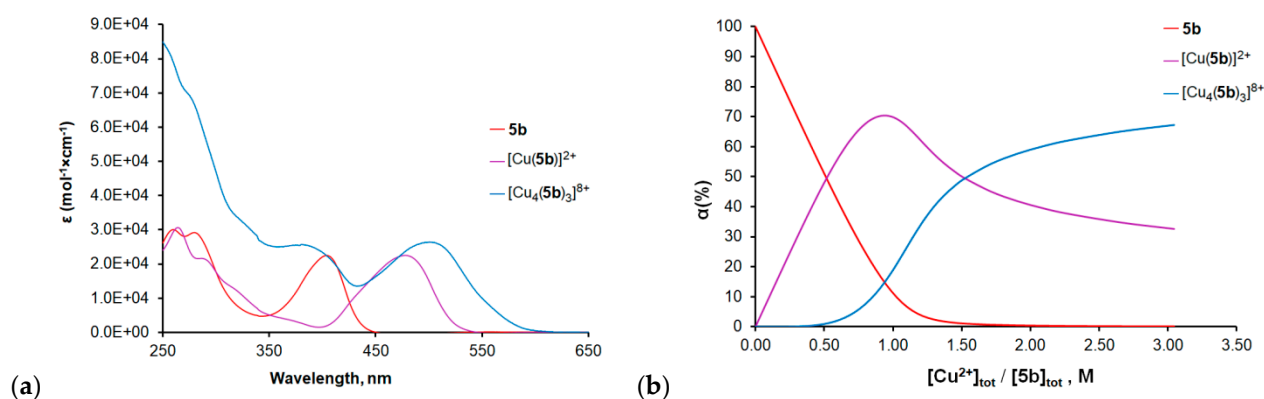

**Figure S24.** (a) UV-vis spectra of **5b**,  $[Cu(5b)]^{2+}$  and  $[Cu_4(5b)_3]^{8+}$  in acetonitrile calculated using HypSpec program.[2] (b) Species distribution diagram for the **5b**/ $Cu^{2+}$  system in acetonitrile calculated using HypSpec program.[2] Data were fit with HypSpec using the following model:

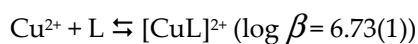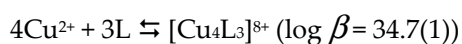

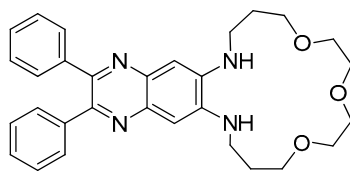

**5c**

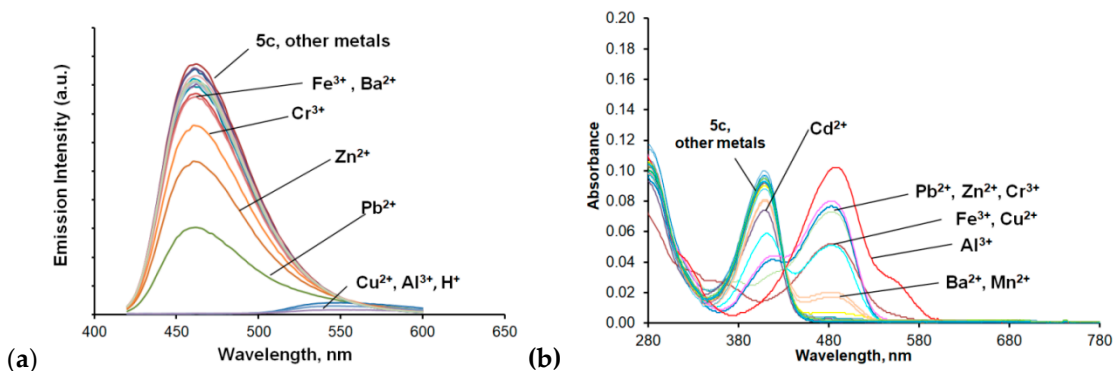

**Figure S25.** Luminescence (a) and absorption (b) spectra of **5c** in acetonitrile ( $[5c] = 4.2 \mu\text{M}$ ,  $\lambda_{\text{ex}} = 409 \text{ nm}$ ) before and after addition of 5 equiv. of metal perchlorate salts.

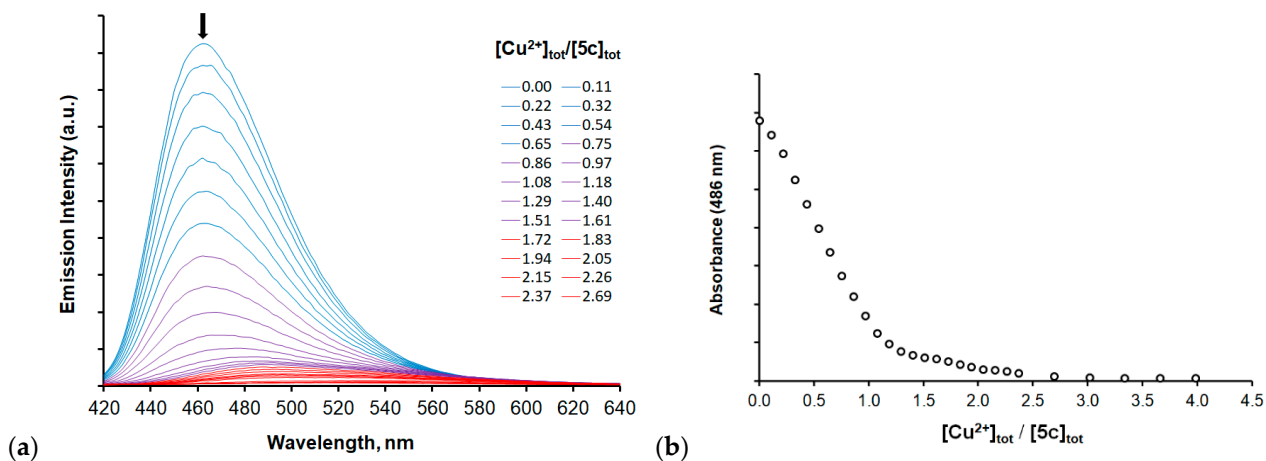

**Figure S26.** (a) Evolution of the emission spectrum of **5c** in acetonitrile ( $[5c]_{\text{tot}} = 4.2 \mu\text{M}$ ,  $\lambda_{\text{ex}} = 409 \text{ nm}$ ) upon addition of  $\text{Cu}(\text{ClO}_4)_2$  (0–4 equiv.). (b) Changes of the emission intensity as a function of the  $[\text{Cu}^{2+}]_{\text{tot}}/[\text{5c}]_{\text{tot}}$  ratio at  $\lambda_{\text{em}} = 486 \text{ nm}$ .

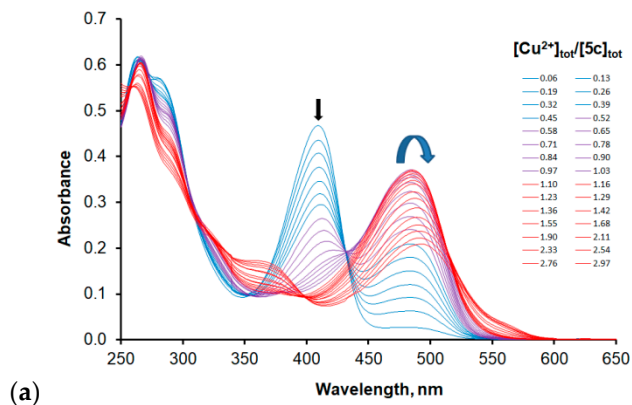



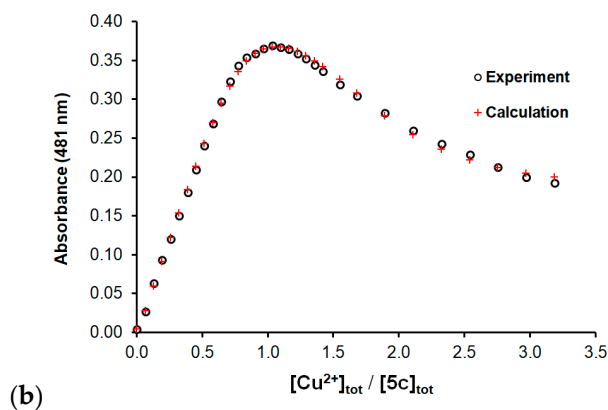

**Figure S27.** (a) Evolution of the UV–vis absorption spectrum of **5c** in acetonitrile ( $[5c] = 24.4 \mu\text{M}$ ) upon addition of  $\text{Cu}(\text{ClO}_4)_2$  (0–3 equiv.). (b) Changes of the absorbance as a function of the  $[\text{Cu}^{2+}]_{\text{tot}}/[\mathbf{5c}]_{\text{tot}}$  ratio at  $\lambda = 481 \text{ nm}$ .

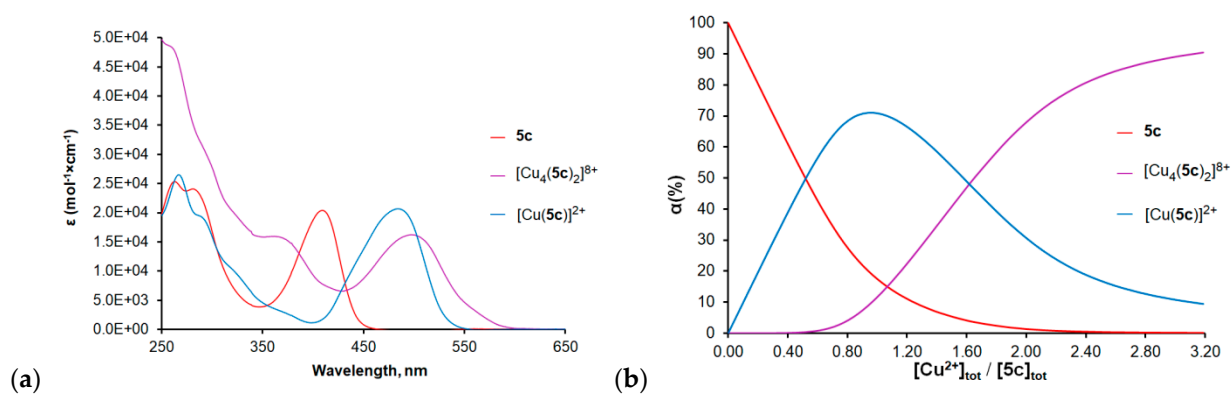

**Figure S28.** (a) UV–vis spectra of **5c**,  $[\text{Cu}(\mathbf{5c})]^{2+}$  and  $[\text{Cu}_4(\mathbf{5c})_2]^{8+}$  in acetonitrile calculated using HypSpec program.[2] (b) Species distribution diagram for the **5c**/ $\text{Cu}^{2+}$  system in acetonitrile calculated using HypSpec program.[2] Data were fit with HypSpec using the following model:

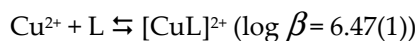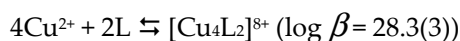

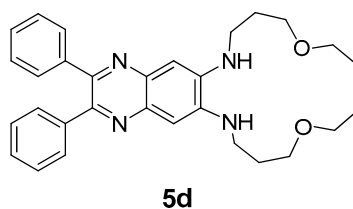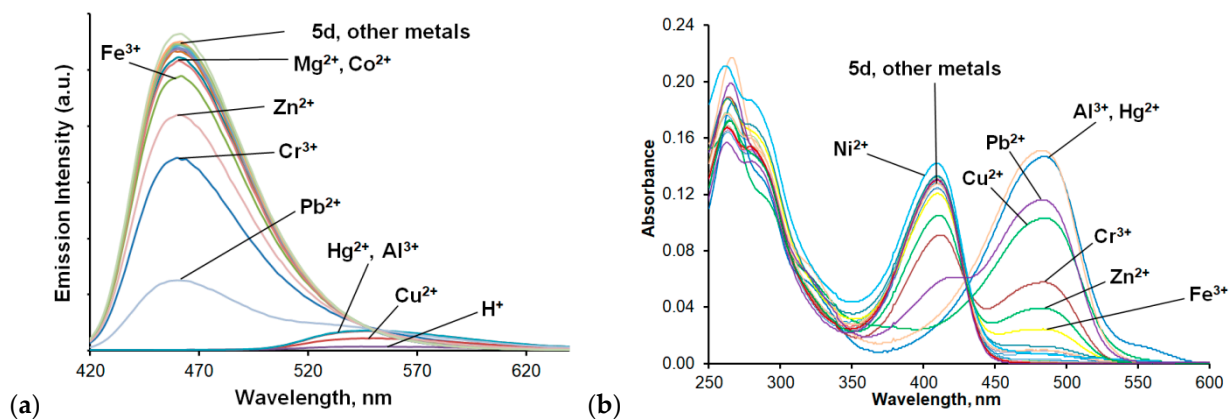

**Figure S29.** Luminescence (a) and absorption (b) spectra of **5d** in acetonitrile ([**5d**] = 4.8  $\mu$ M,  $\lambda_{\text{ex}}$  = 410 nm) before and after addition of 5 equiv. of metal perchlorate salts.

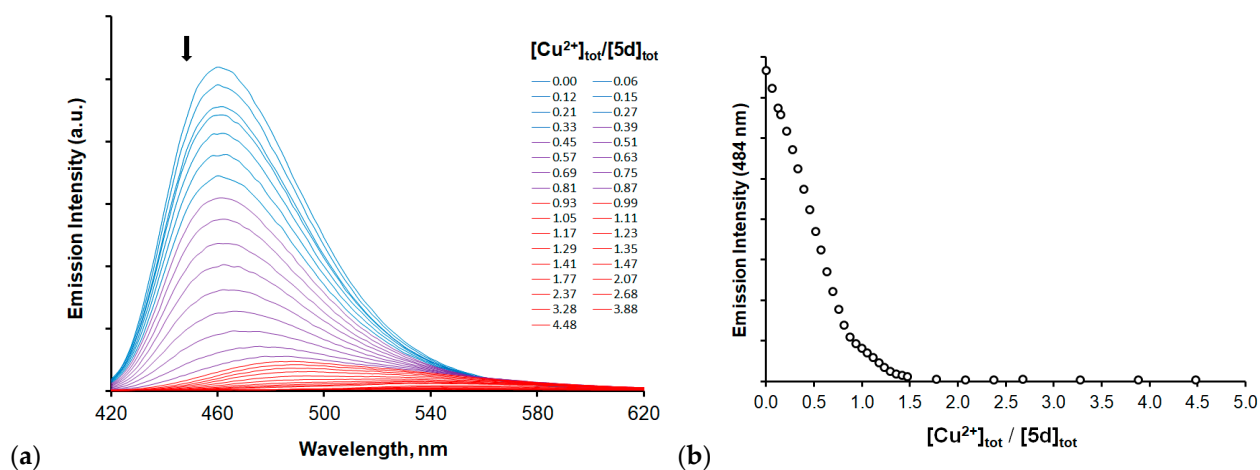

**Figure S30.** (a) Evolution of the emission spectrum of **5d** in acetonitrile ([**5d**]<sub>tot</sub> = 4.8  $\mu$ M,  $\lambda_{\text{ex}}$  = 410 nm) upon addition of  $\text{Cu}(\text{ClO}_4)_2$  (0–4.5 equiv.). (b) Changes of the emission intensity as a function of the  $[\text{Cu}^{2+}]_{\text{tot}}/[\text{5d}]_{\text{tot}}$  ratio at  $\lambda_{\text{em}}$  = 486 nm.

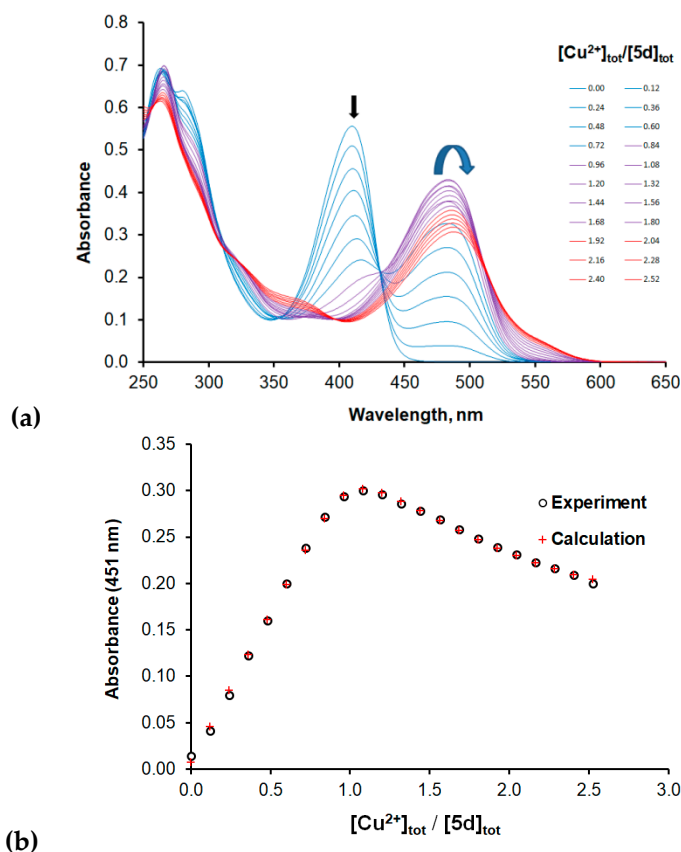

**Figure S31.** (a) Evolution of the UV-vis absorption spectrum of **5d** in acetonitrile ( $[5d] = 21.5 \mu\text{M}$ ) upon addition of  $\text{Cu}(\text{ClO}_4)_2$  (0–2.5 equiv.). (b) Changes of the absorbance as a function of the  $[\text{Cu}^{2+}]_{\text{tot}}/[\text{5d}]_{\text{tot}}$  ratio at  $\lambda = 451 \text{ nm}$ .

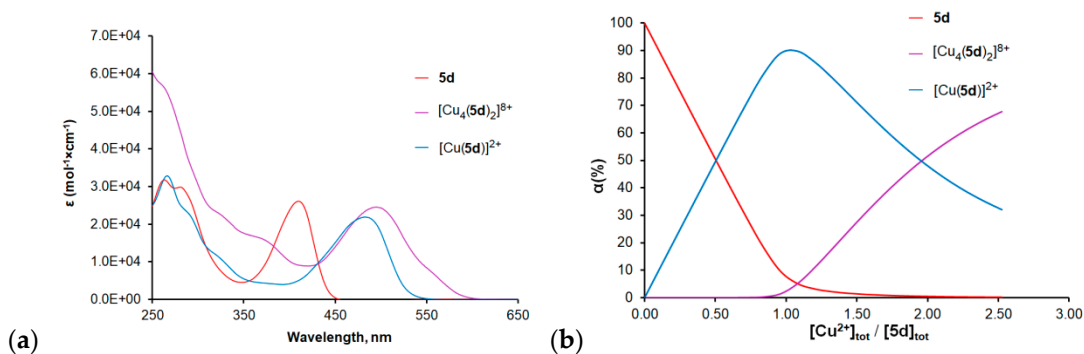

**Figure S32.** (a) UV-vis spectra of **5d**,  $[\text{Cu}(\text{5d})]^{2+}$  and  $[\text{Cu}_4(\text{5d})_2]^{8+}$  in acetonitrile calculated using HypSpec program.[2] (b) Species distribution diagram for the **5d**/ $\text{Cu}^{2+}$  system in acetonitrile calculated using HypSpec program.[2] Data were fit with HypSpec using the following model:

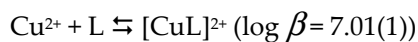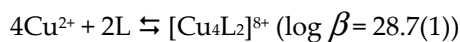

#### 4. Protonation Studies of 5c and 5e

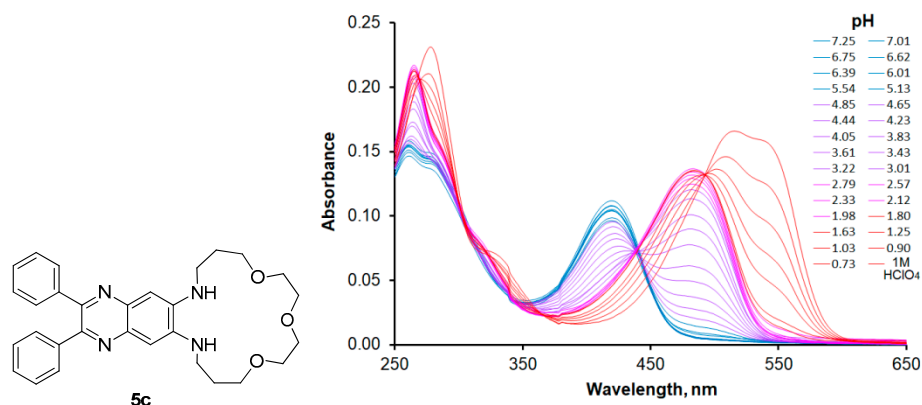

**Figure S33.** Spectrophotometric titration of 5c as a function of pH ( $[5c]_{\text{tot}} = 8.4 \mu\text{M}$ , 1 vol% MeOH,  $I = 0.1 \text{ M}$  NaClO<sub>4</sub>, pH = 0 – 7.3).

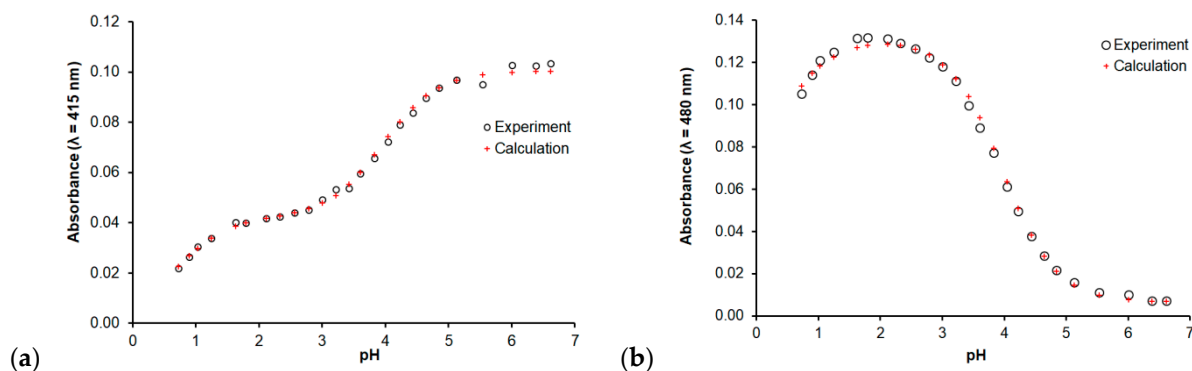

**Figure S34.** Absorbance changes with pH at  $\lambda = 415 \text{ nm}$  (a) and  $\lambda = 480 \text{ nm}$  (b) for 5c.

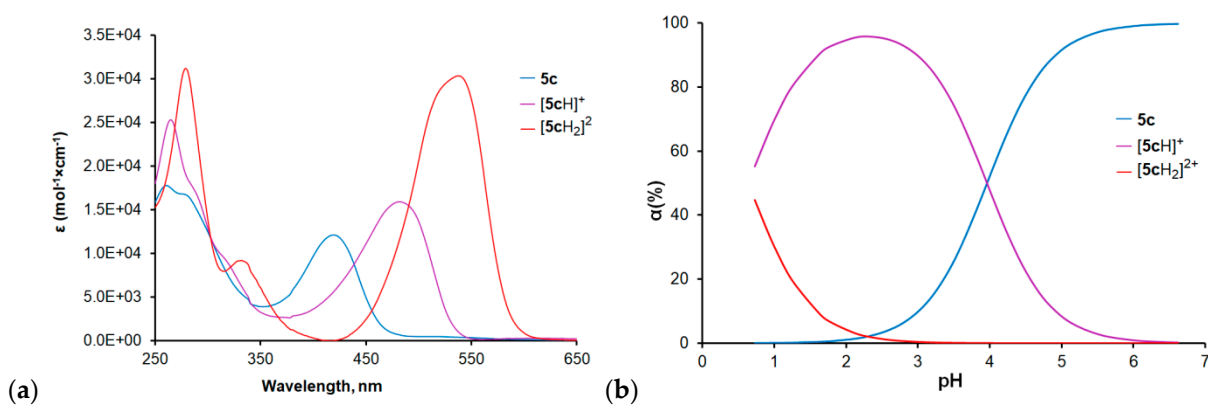

**Figure S35.** (a) UV-vis spectra of 5c, [5cH]<sup>+</sup> and [5cH<sub>2</sub>]<sup>2+</sup> in water calculated using HypSpec program.[2] (b) Species distribution diagram for the 5c  $\rightleftharpoons$  [5cH]<sup>+</sup>  $\rightleftharpoons$  [5cH<sub>2</sub>]<sup>2+</sup> system in water calculated using HypSpec program.[2]

$\text{pK}_1 = 4.10(5)$ ;  $\text{pK}_2 = 0.6(1)$ .

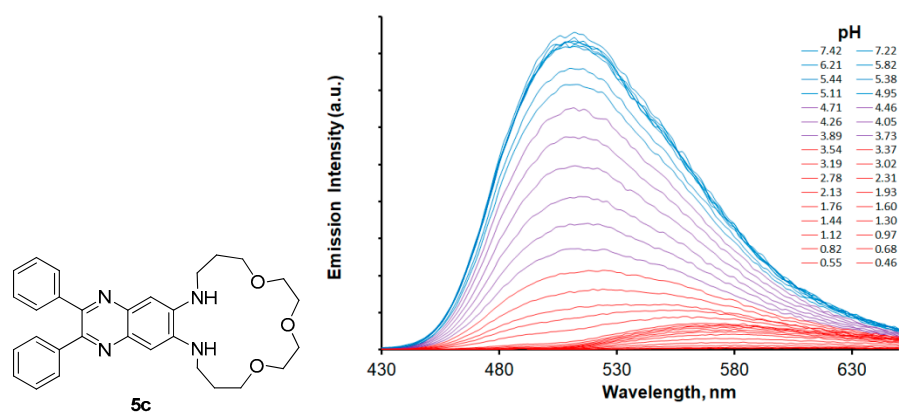

**Figure S36.** Fluorimetric titration of **5c** as a function of pH ( $[\mathbf{5c}]_{\text{tot}} = 4.2 \mu\text{M}$ , 0.5 vol% MeOH,  $I = 0.1 \text{ M NaClO}_4$ ,  $\lambda_{\text{ex}} = 420 \text{ nm}$ , pH = 0.5 – 7.4).

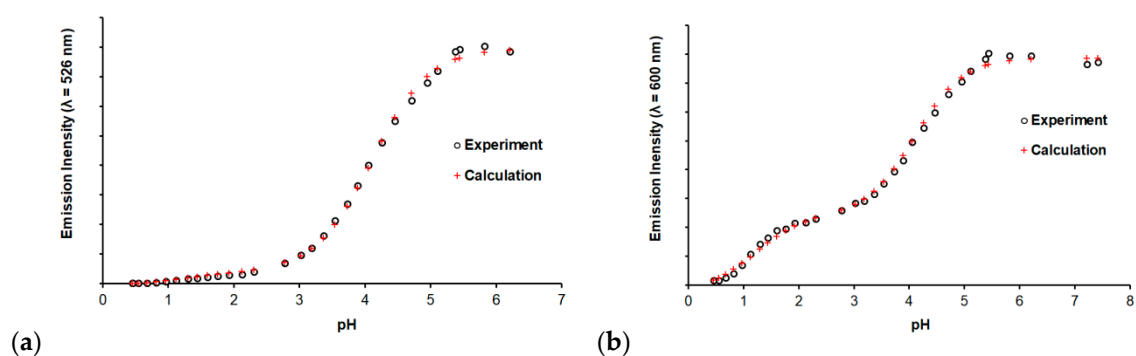

**Figure S37.** Emission intensity changes with pH at  $\lambda = 526 \text{ nm}$  (a) and  $\lambda = 600 \text{ nm}$  (b) for **5c**.

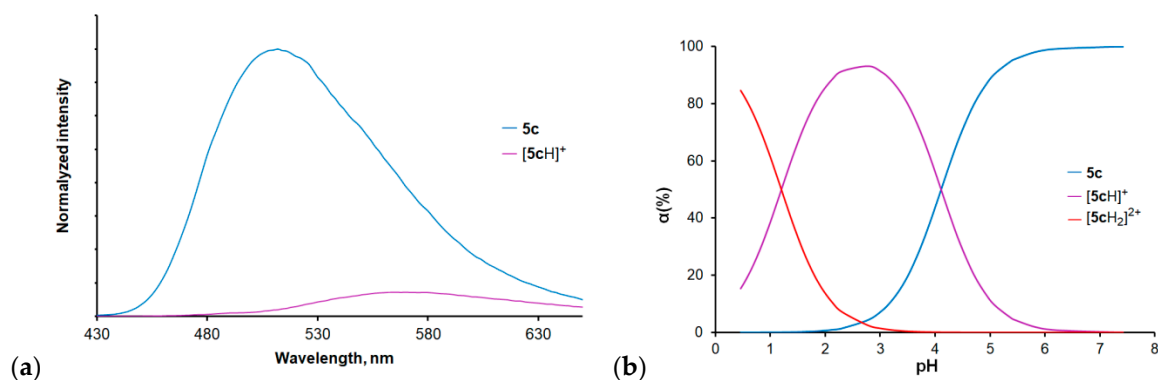

**Figure S38.** (a) Emission spectra of **5c** and  $[\mathbf{5cH}]^+$  in water calculated using HypSpec program,[2]  $[\mathbf{5cH}_2]^{2+}$  was considered to be non-emissive; (b) Species distribution diagram for the  $\mathbf{5c} \rightleftharpoons [\mathbf{5cH}]^+ \rightleftharpoons [\mathbf{5cH}_2]^{2+}$  system in water calculated using HypSpec program.[2]

$\text{pK}_1 = 3.96(5)$ ;  $\text{pK}_2 = 1.20(5)$ .

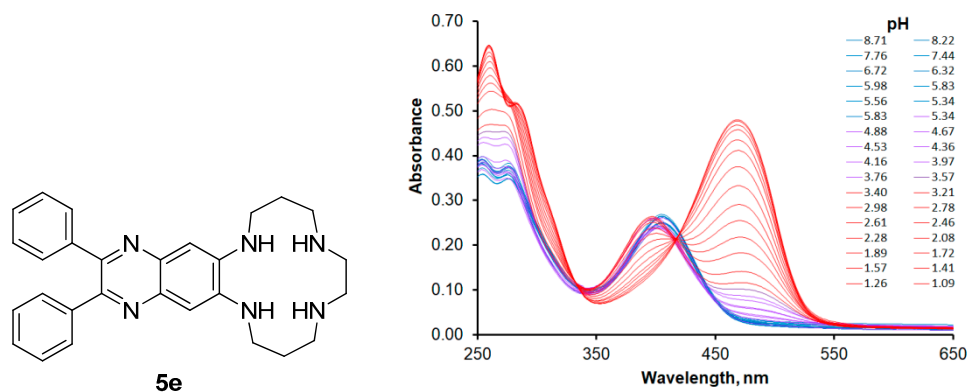

**Figure S39.** Spectrophotometric titration of **5e** ( $[\mathbf{5e}]_{\text{tot}} = 31.1 \mu\text{M}$ ,  $I = 0.1 \text{ M NaClO}_4$ ,  $\text{pH} = 1.1\text{--}8.8$ ).

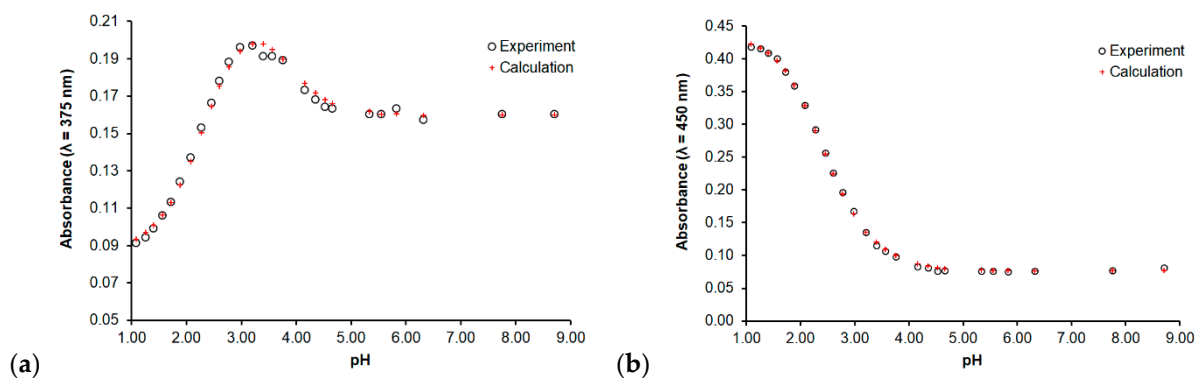

**Figure S40.** Absorbance changes with  $\text{pH}$  at  $\lambda = 375 \text{ nm}$  (a) and  $\lambda = 450 \text{ nm}$  (b) for **5e**.

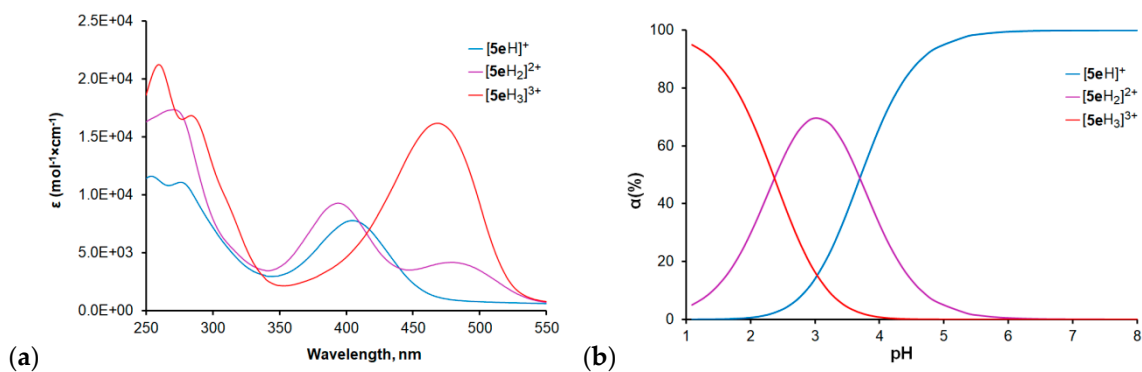

**Figure S41.** (a) UV-vis spectra of  $[\mathbf{5eH}]^+$ ,  $[\mathbf{5eH}_2]^{2+}$  and  $[\mathbf{5eH}_3]^{3+}$  in water calculated using HypSpec program.[2] (b) Species distribution diagram for the  $[\mathbf{5eH}]^+ \rightleftharpoons [\mathbf{5eH}_2]^{2+} \rightleftharpoons [\mathbf{5eH}_3]^{3+}$  system in water calculated using HypSpec program.[2]

$\text{pK}_2 = 3.69(5)$ ;  $\text{pK}_3 = 2.36(5)$ .

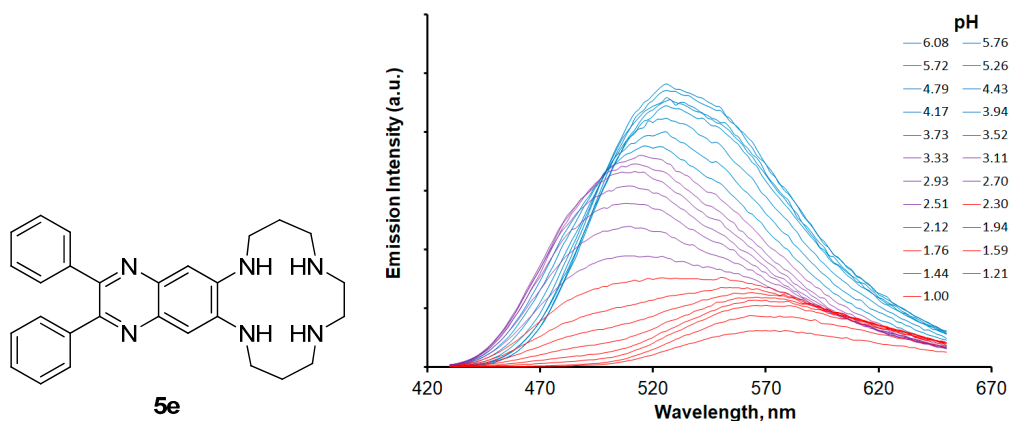

**Figure S42.** Fluorimetric titration of **5e** as a function of pH ( $[\mathbf{5e}]_{\text{tot}} = 8.04 \mu\text{M}$ ,  $I = 0.1 \text{ M NaClO}_4$ ,  $\lambda_{\text{ex}} = 420 \text{ nm}$ , pH = 1.0 – 6.1).

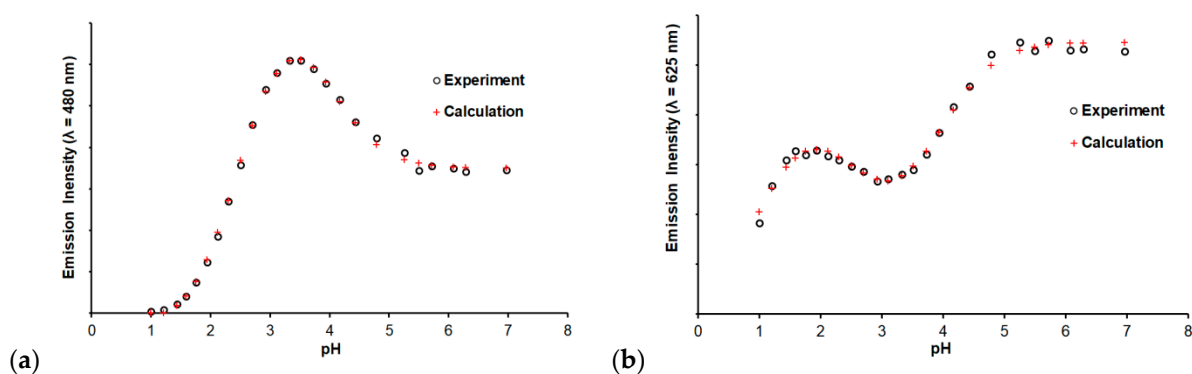

**Figure S43.** Emission intensity changes with pH at  $\lambda = 480 \text{ nm}$  (a) and  $\lambda = 625 \text{ nm}$  (b) for **5e**.

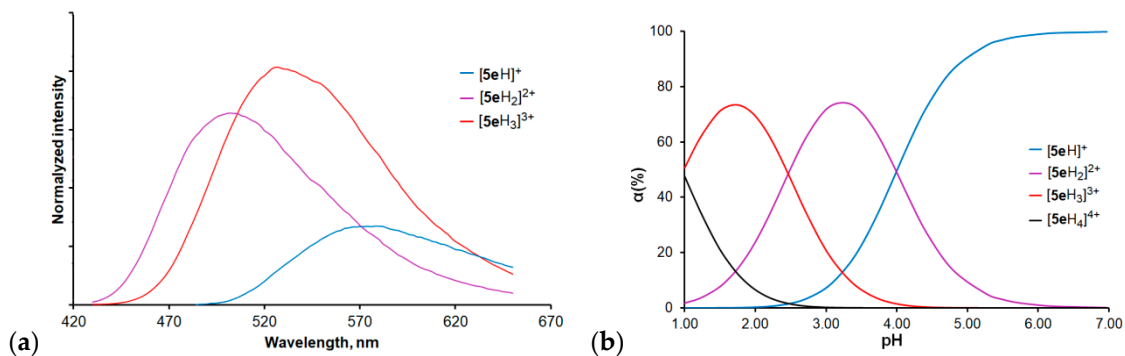

**Figure S44.** (a) Emission spectra of  $[\mathbf{5eH}]^+$ ,  $[\mathbf{5eH}_2]^{2+}$  and  $[\mathbf{5eH}_3]^{3+}$  in water calculated using HypSpec program,[2]  $[\mathbf{5eH}_4]^{4+}$  was considered to be non-emissive; (b) Species distribution diagram for the  $[\mathbf{5eH}]^+ \rightleftharpoons [\mathbf{5eH}_2]^{2+} \rightleftharpoons [\mathbf{5eH}_3]^{3+} \rightleftharpoons [\mathbf{5eH}_4]^{4+}$  system in water calculated using HypSpec program.[2]

$\text{pK}_1 = 4.01(5)$ ;  $\text{pK}_2 = 2.46(5)$ ;  $\text{pK}_3 = 1.0(1)$ .

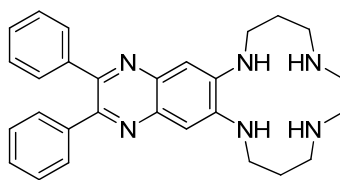

**5e**

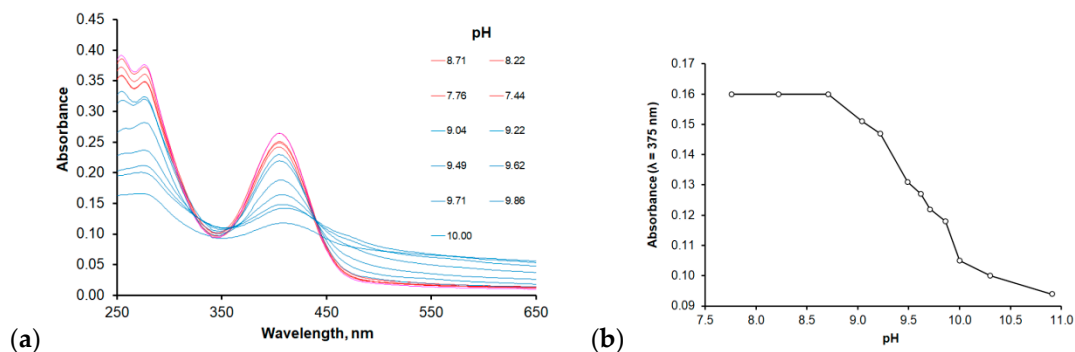

**Figure S45.** (a) UV-vis spectra of **5e** solution ( $[\mathbf{5e}]_{\text{tot}} = 31.1 \mu\text{M}$ ,  $I = 0.1 \text{ M NaClO}_4$ ,  $\text{pH} = 8.7\text{--}10.0$ ); (b) Absorbance changes with  $\text{pH}$  at  $\lambda = 375 \text{ nm}$ . Formation of precipitate is observed in the cell.

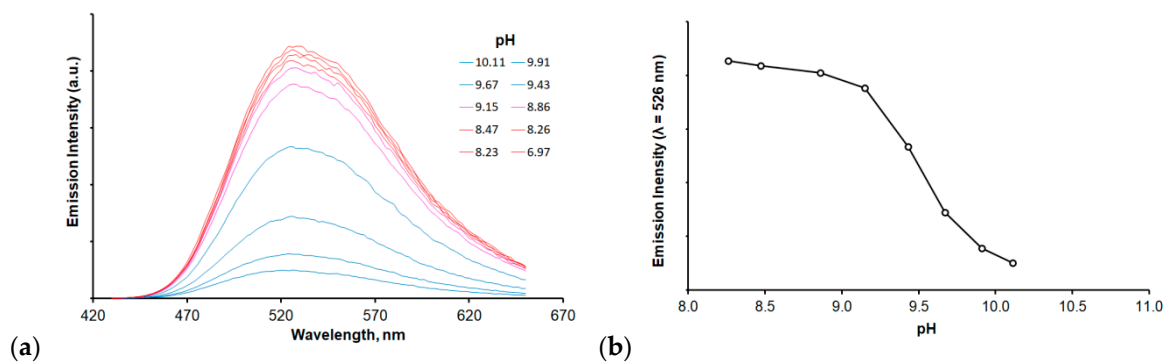

**Figure S46.** (a) Luminescence spectra spectra of **5e** solution ( $[\mathbf{5e}]_{\text{tot}} = 8.04 \mu\text{M}$ ,  $I = 0.1 \text{ M NaClO}_4$ ,  $\text{pH} = 7.0\text{--}10.1$ ); (b) Emission intensity changes with  $\text{pH}$  at  $\lambda = 526 \text{ nm}$ . Formation of precipitate is observed in the cell.



## 5. NMR Spectra of New Compounds.

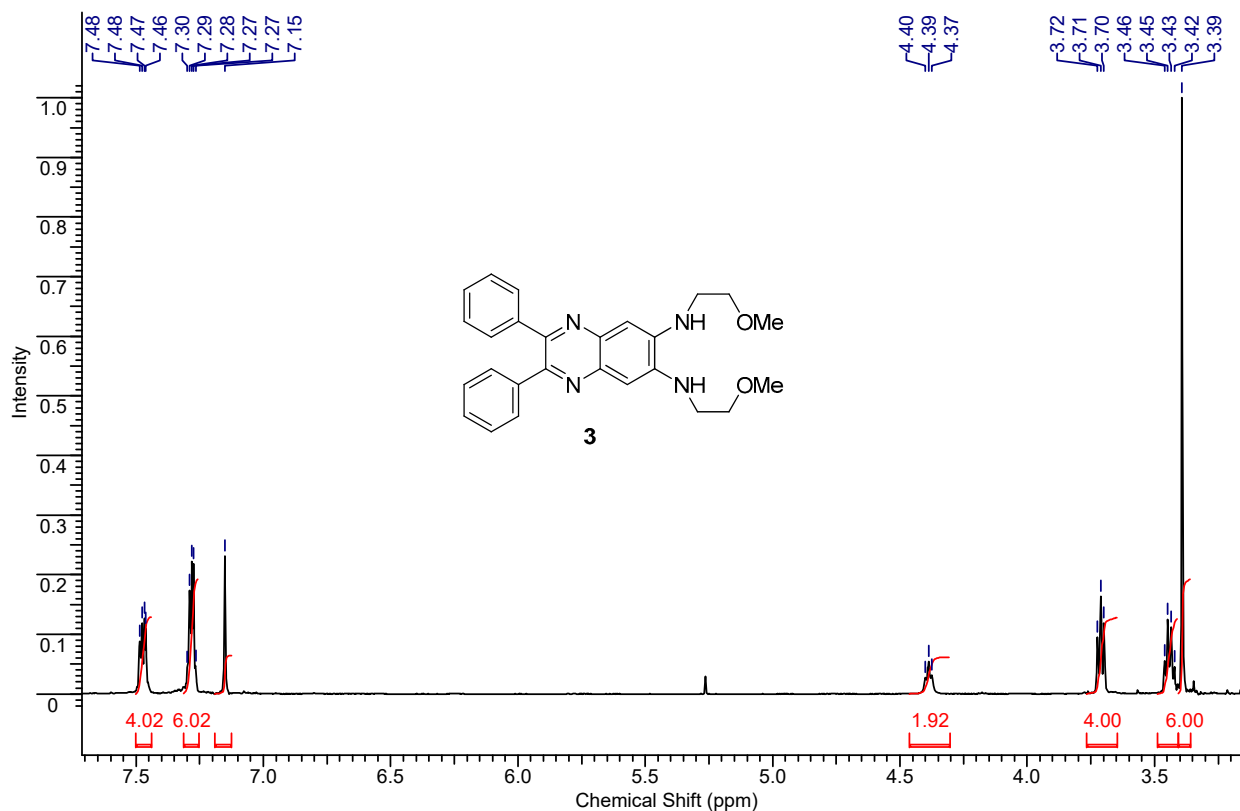

**Figure S47.** <sup>1</sup>H NMR spectrum of the compound **3** (CDCl<sub>3</sub>, 400 MHz, 300 K).

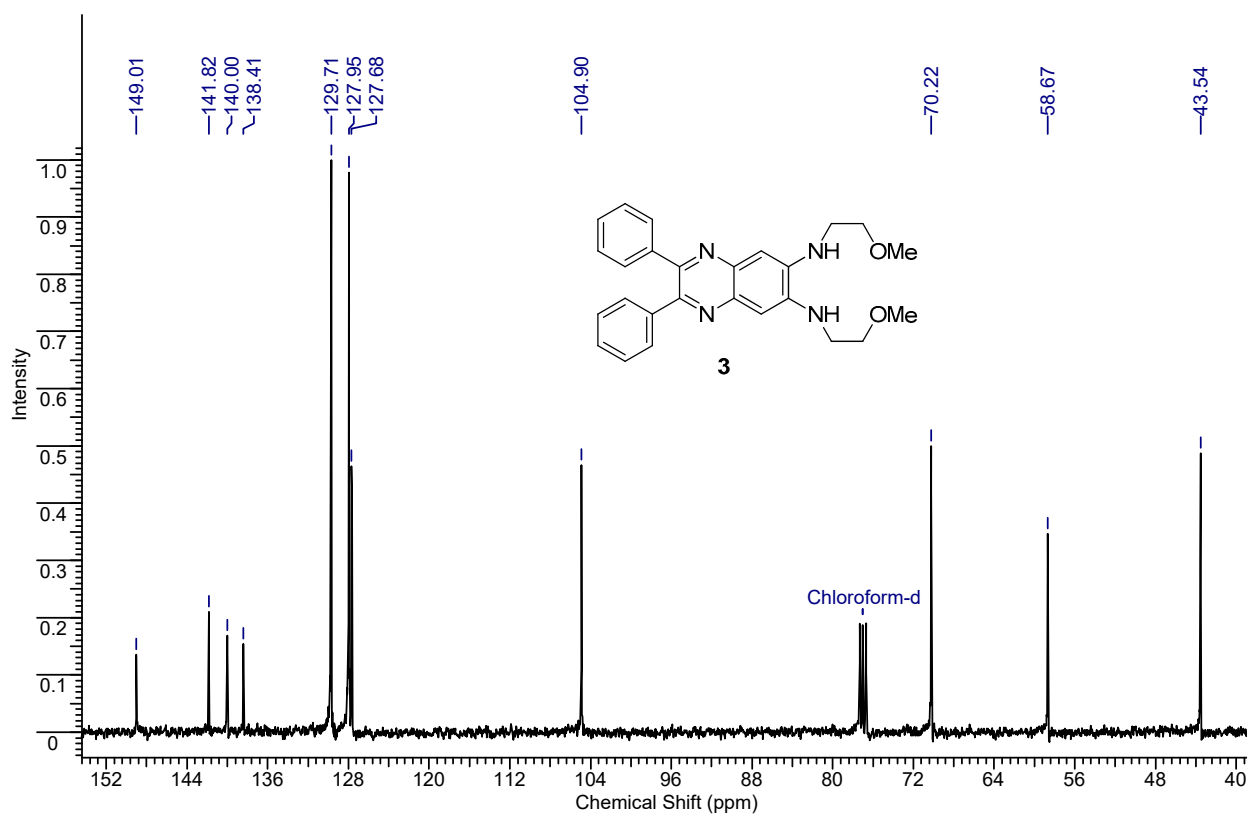

**Figure S48.** <sup>13</sup>C NMR spectrum of the compound **3** (CDCl<sub>3</sub>, 100.6 MHz, 300 K).

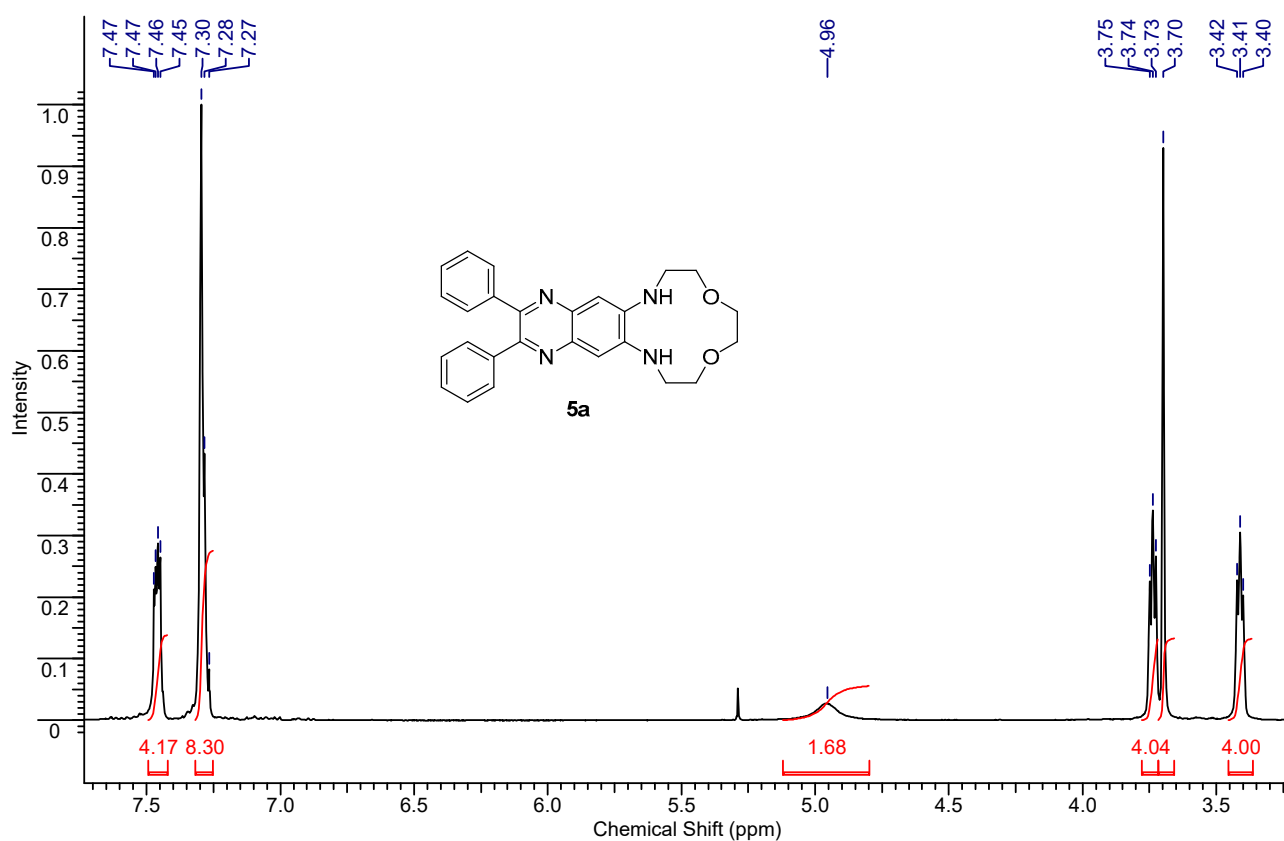

**Figure S49.** <sup>1</sup>H NMR spectrum of the compound **5a** (CDCl<sub>3</sub>, 400 MHz, 300 K).

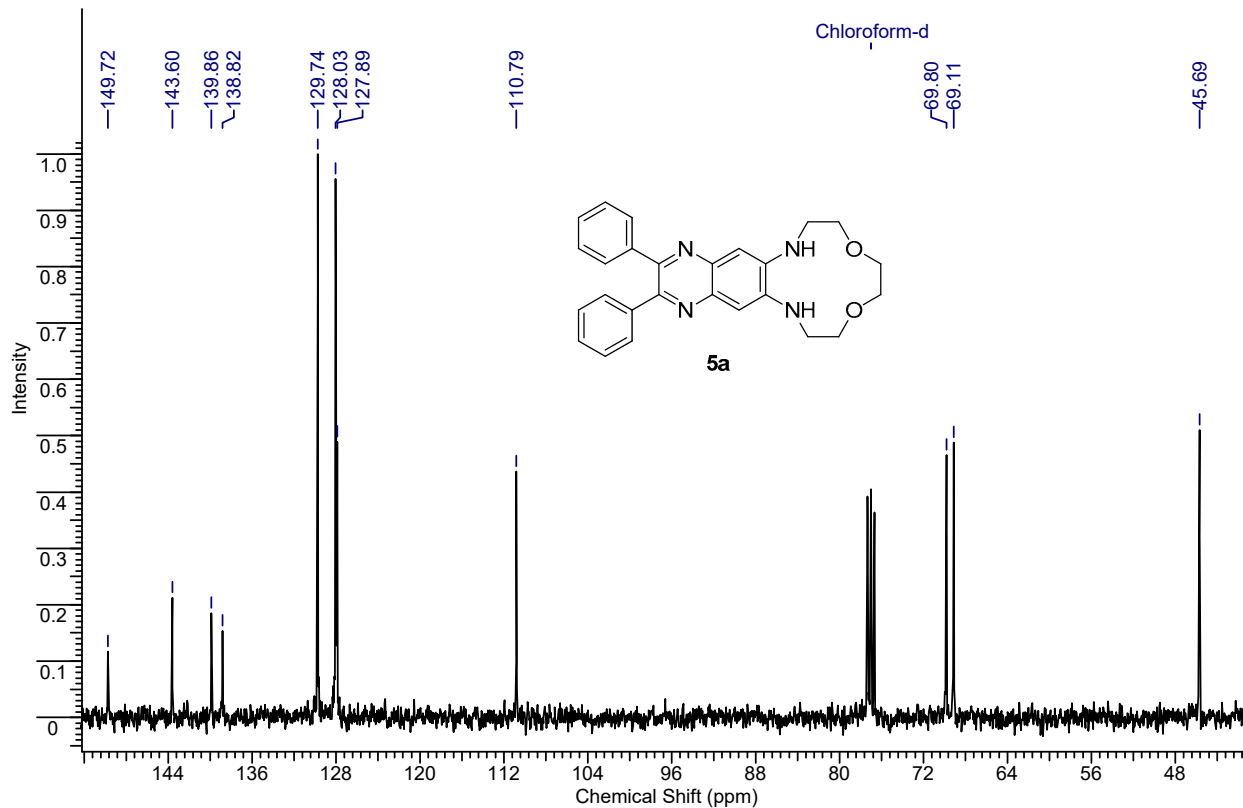

**Figure S50.** <sup>13</sup>C NMR spectrum of the compound **5a** (CDCl<sub>3</sub>, 100.6 MHz, 300 K).

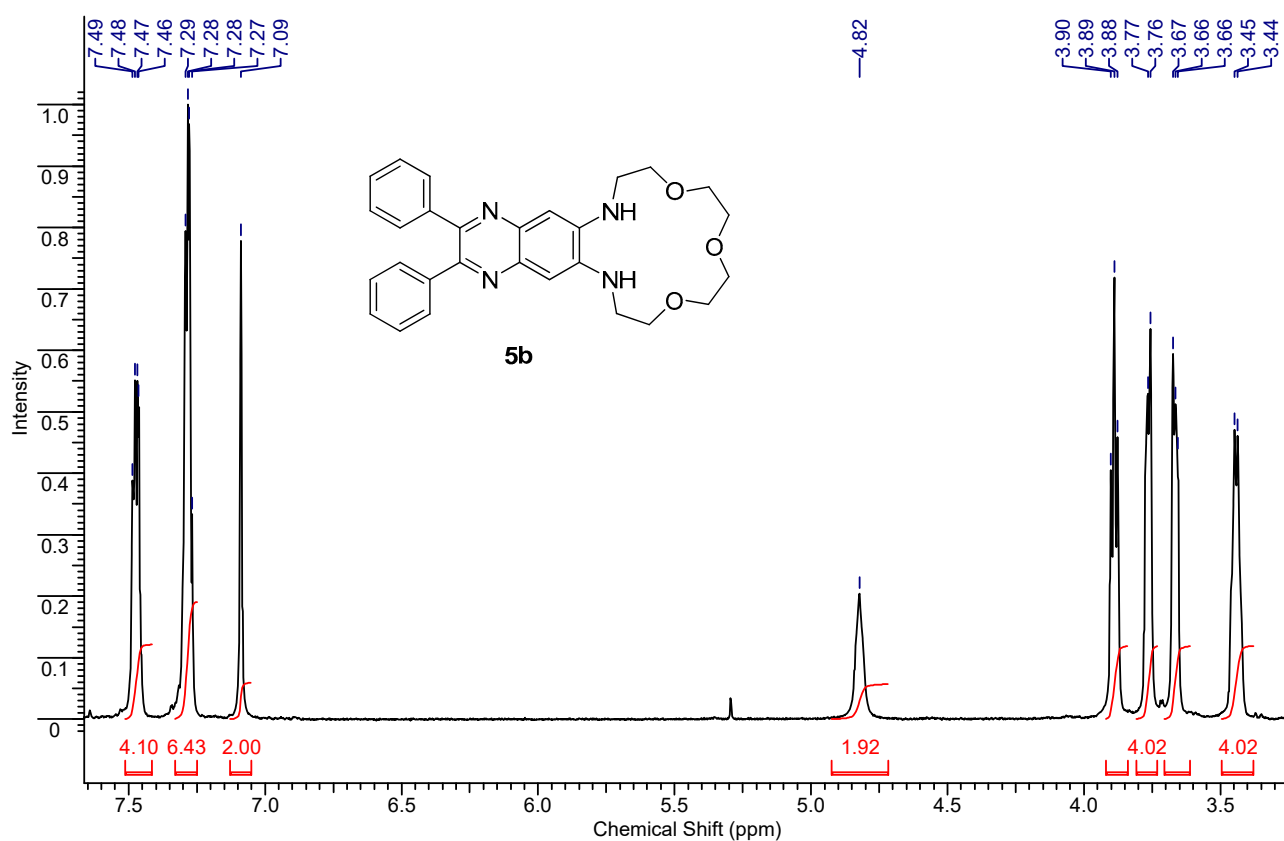

**Figure S51.** <sup>1</sup>H NMR spectrum of the compound **5b** (CDCl<sub>3</sub>, 400 MHz, 300 K).

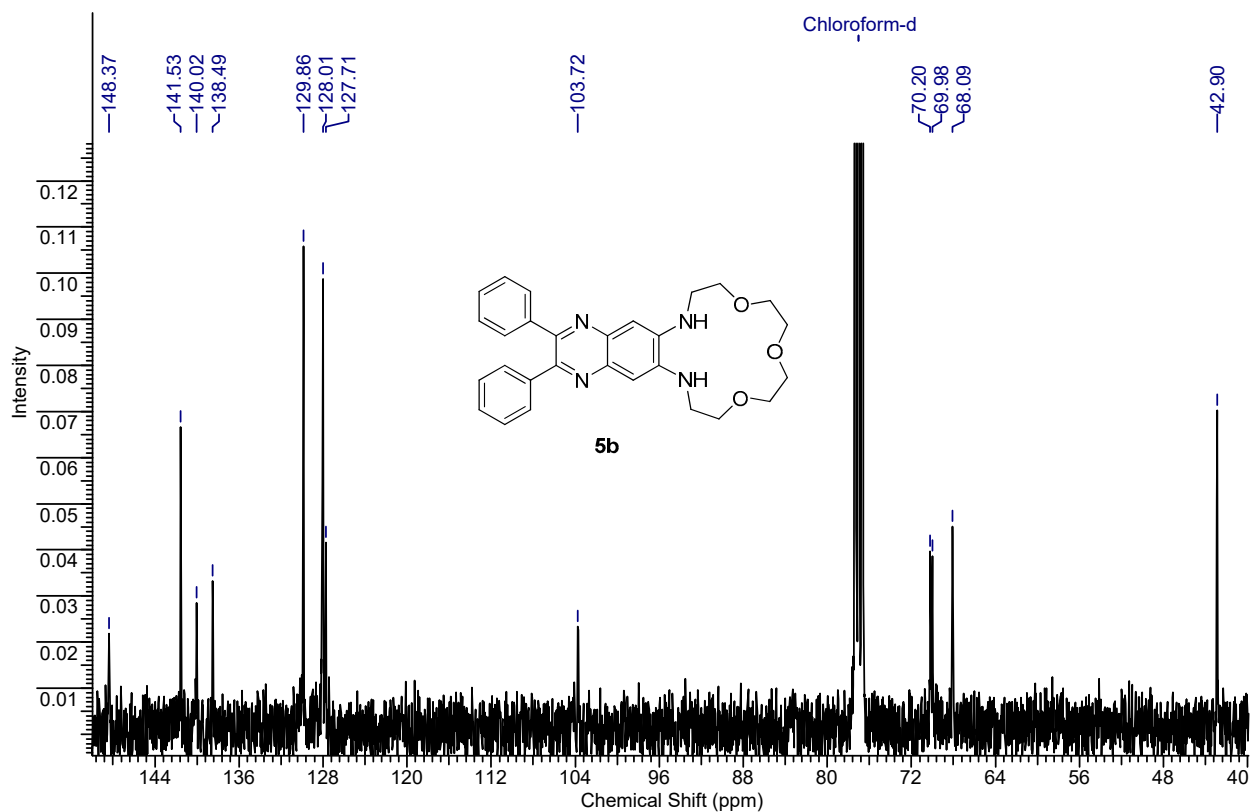

**Figure S52.** <sup>13</sup>C NMR spectrum of the compound **5b** (CDCl<sub>3</sub>, 100.6 MHz, 300 K).

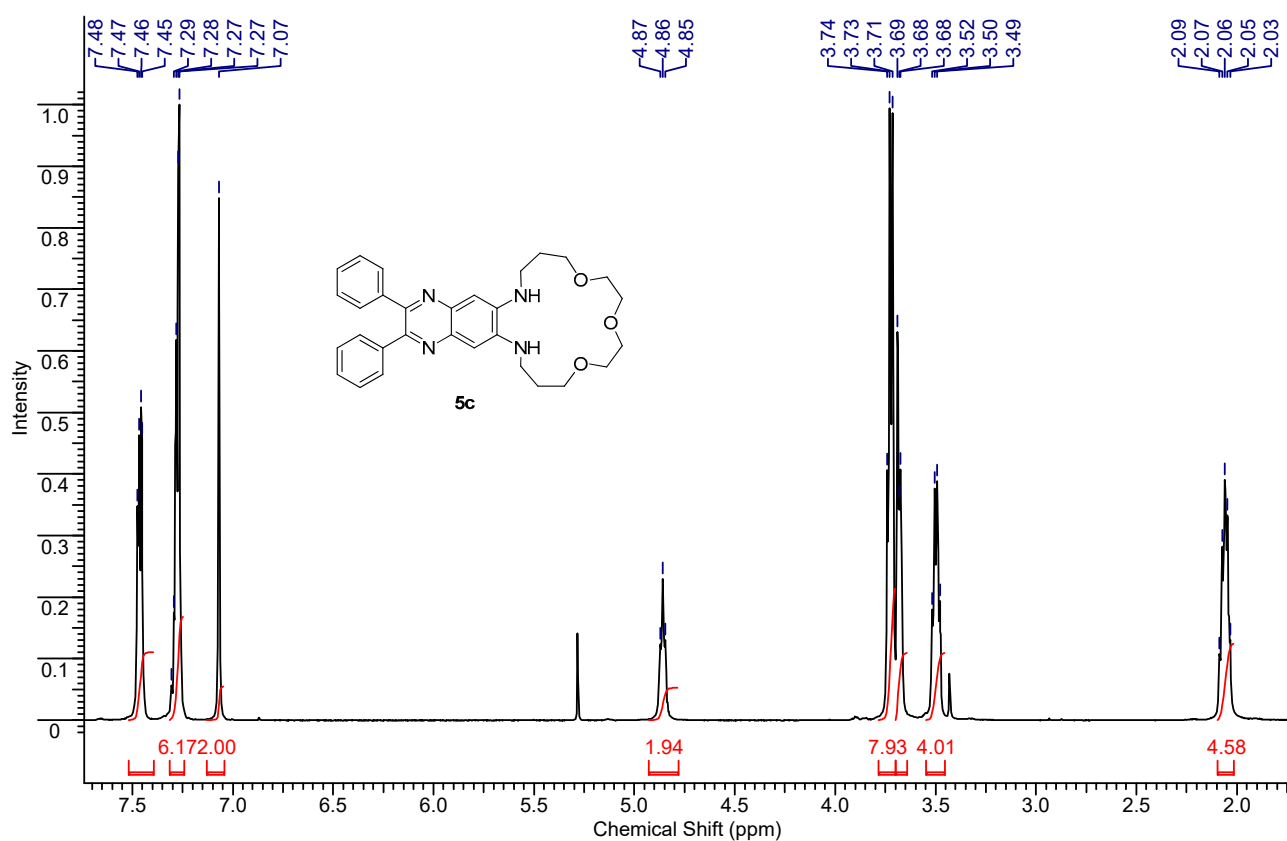

**Figure S53.** <sup>1</sup>H NMR spectrum of the compound **5c** (CDCl<sub>3</sub>, 400 MHz, 300 K).

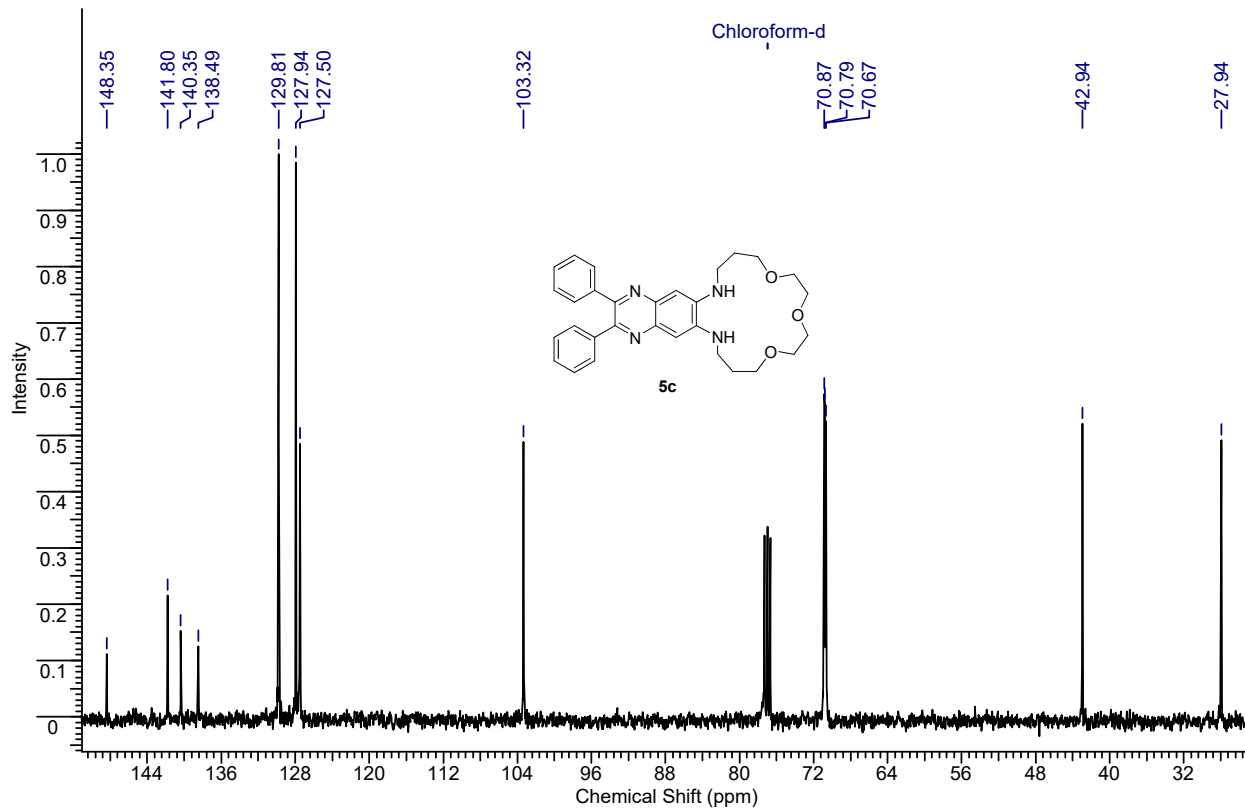

**Figure S54.** <sup>13</sup>C NMR spectrum of the compound **5c** (CDCl<sub>3</sub>, 100.6 MHz, 300 K).

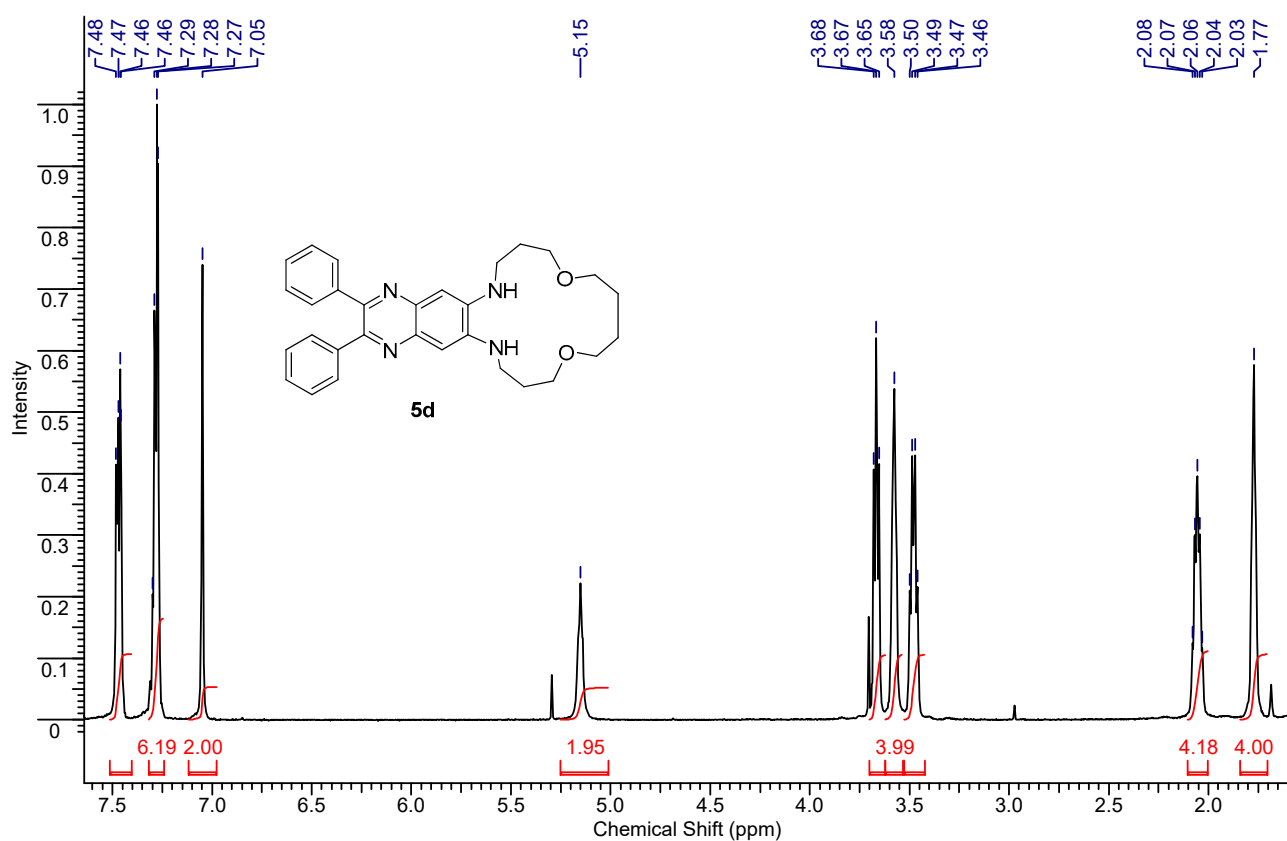

**Figure S55.** <sup>1</sup>H NMR spectrum of the compound **5d** (CDCl<sub>3</sub>, 400 MHz, 300 K).

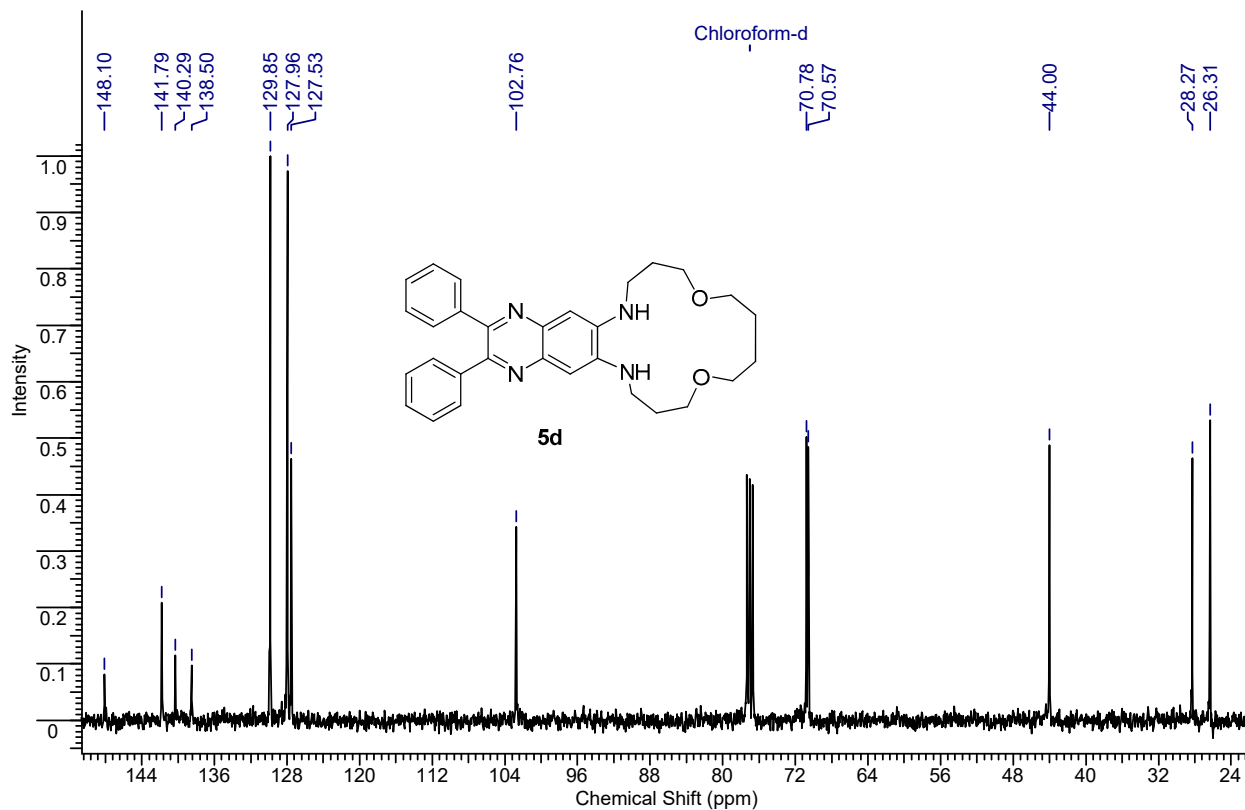

**Figure S56.** <sup>13</sup>C NMR spectrum of the compound **5d** (CDCl<sub>3</sub>, 100.6 MHz, 300 K).

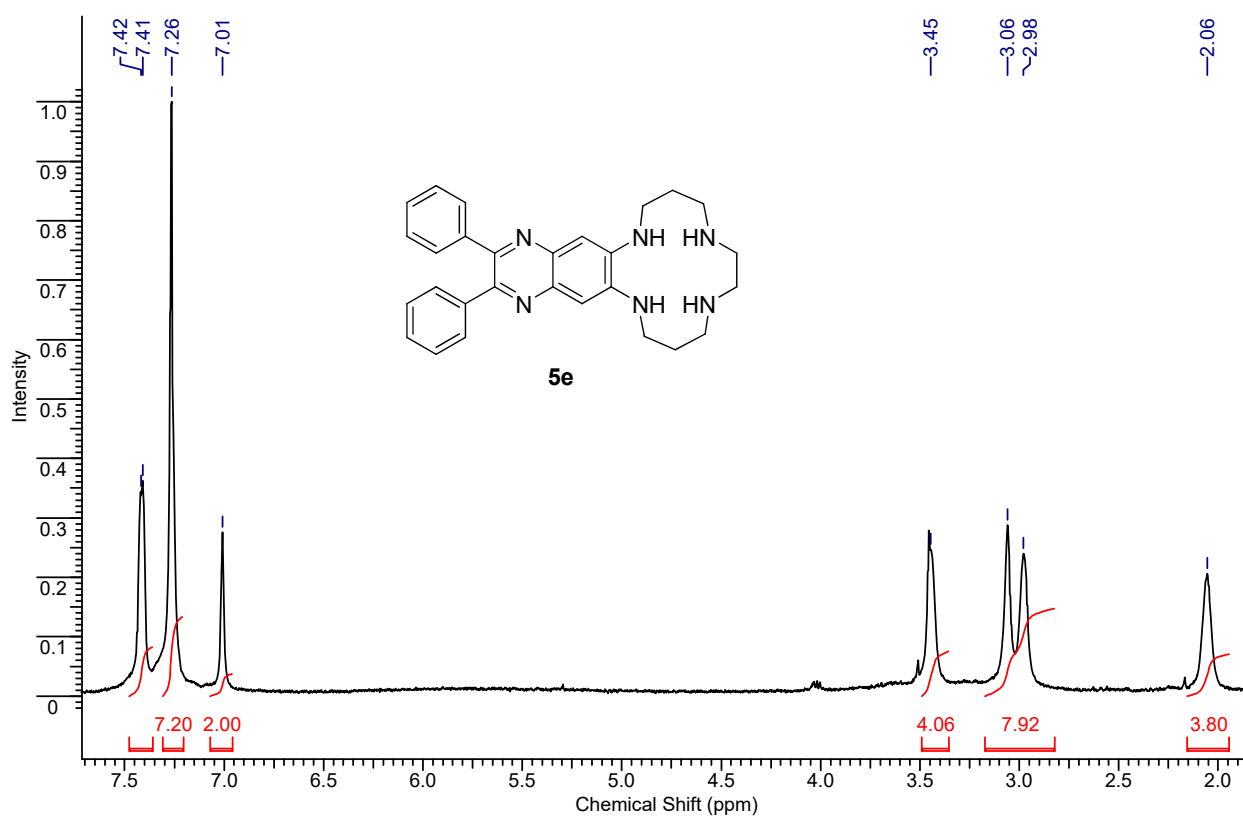

**Figure S57.**  $^1\text{H}$  NMR spectrum of the compound **5e** ( $\text{CDCl}_3/\text{CD}_3\text{OD}$ , 5:1 v/v, 400 MHz, 300 K).

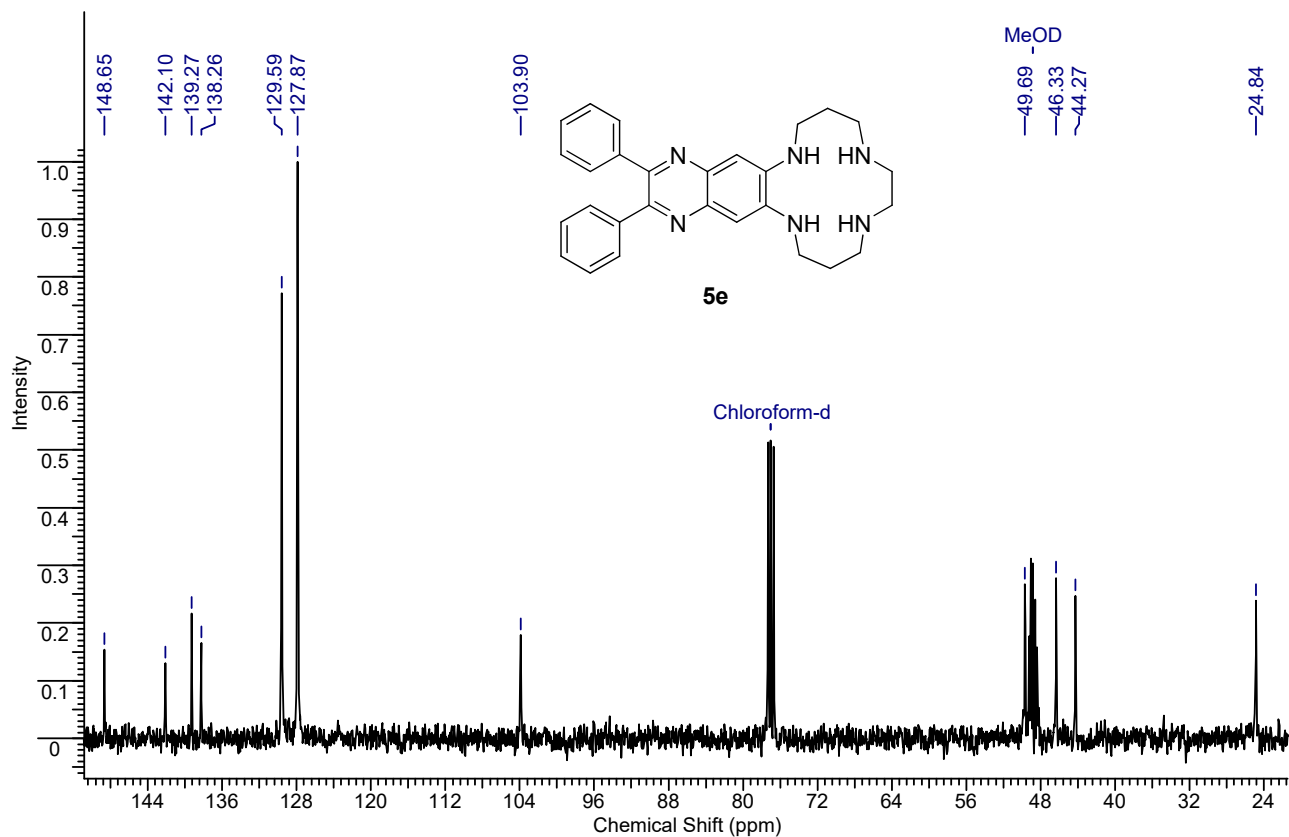

**Figure S58.**  $^{13}\text{C}$  NMR spectrum of the compound **5e** ( $\text{CDCl}_3/\text{CD}_3\text{OD}$ , 5:1 v/v, 100.6 MHz, 300 K).

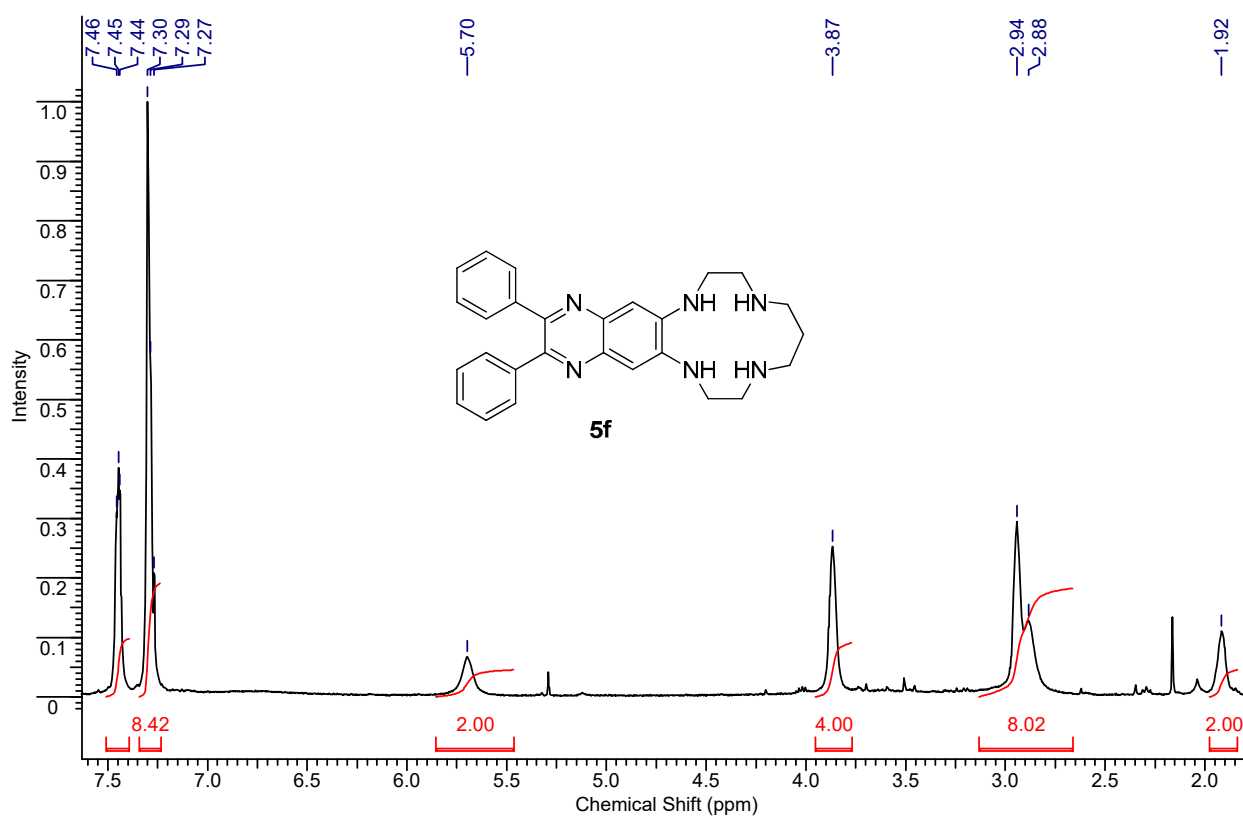

**Figure S59.** <sup>1</sup>H NMR spectrum of the compound **5f** (CDCl<sub>3</sub>/CD<sub>3</sub>OD, 5:1 v/v, 400 MHz, 300 K).

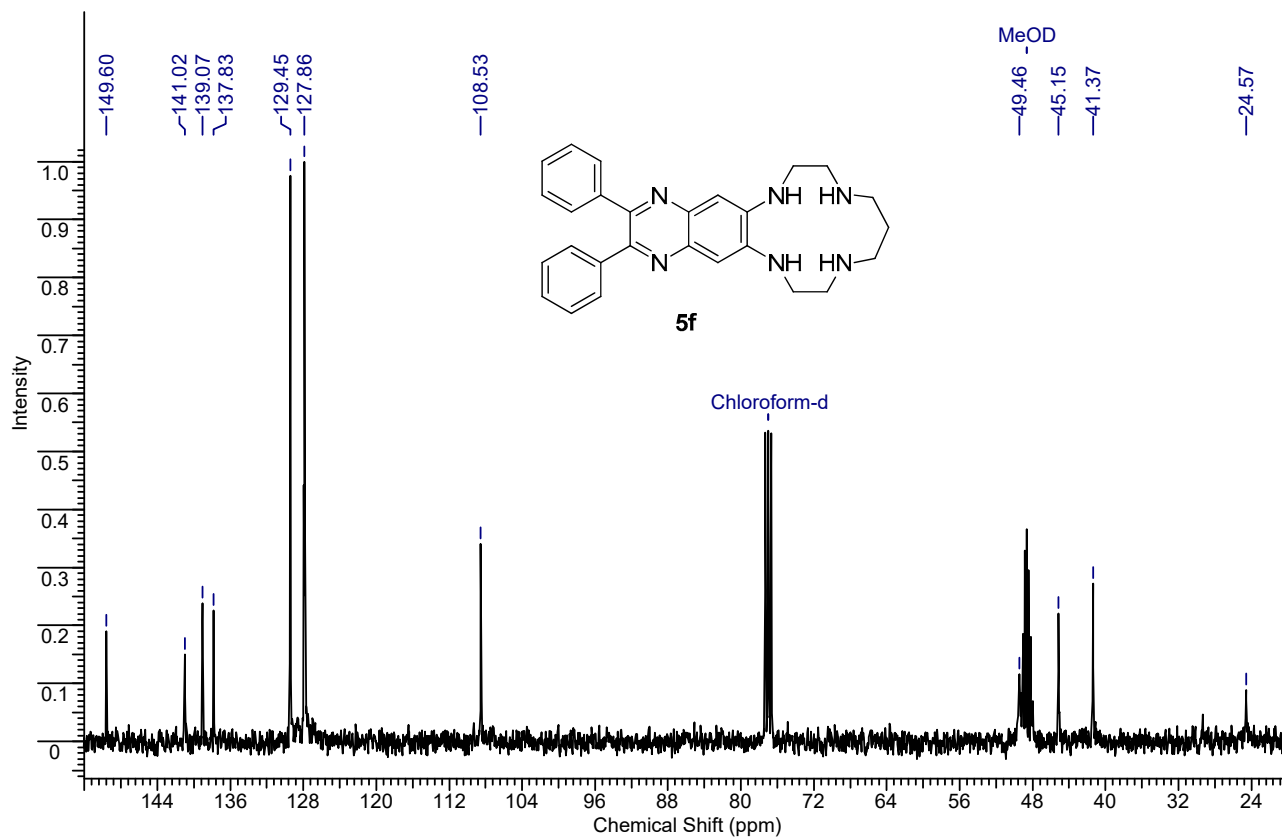

**Figure S60.** <sup>13</sup>C NMR spectrum of the compound **5f** (CDCl<sub>3</sub>/CD<sub>3</sub>OD, 5:1 v/v, 100.6 MHz, 300 K).

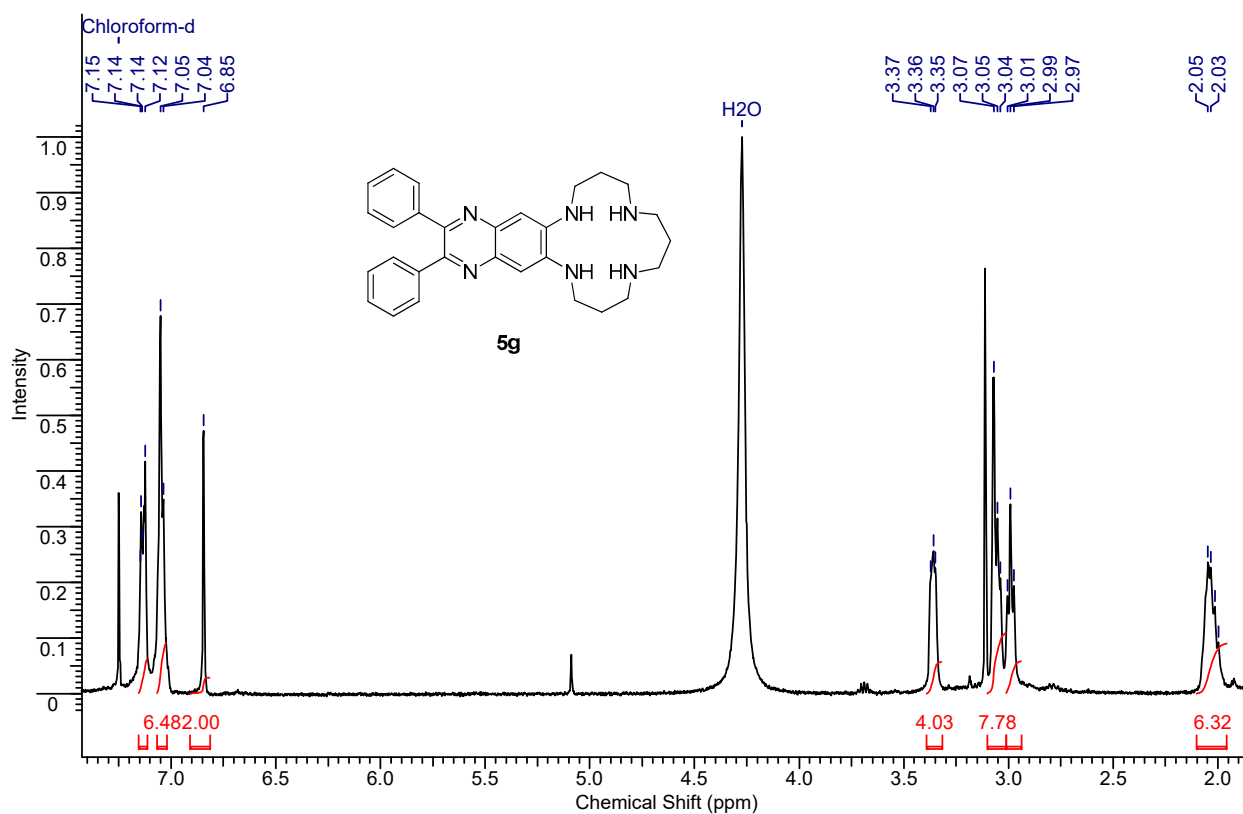

**Figure S61.** <sup>1</sup>H NMR spectrum of the compound **5g** (CDCl<sub>3</sub>/CD<sub>3</sub>OD, 5:1 v/v, 400 MHz, 300 K).

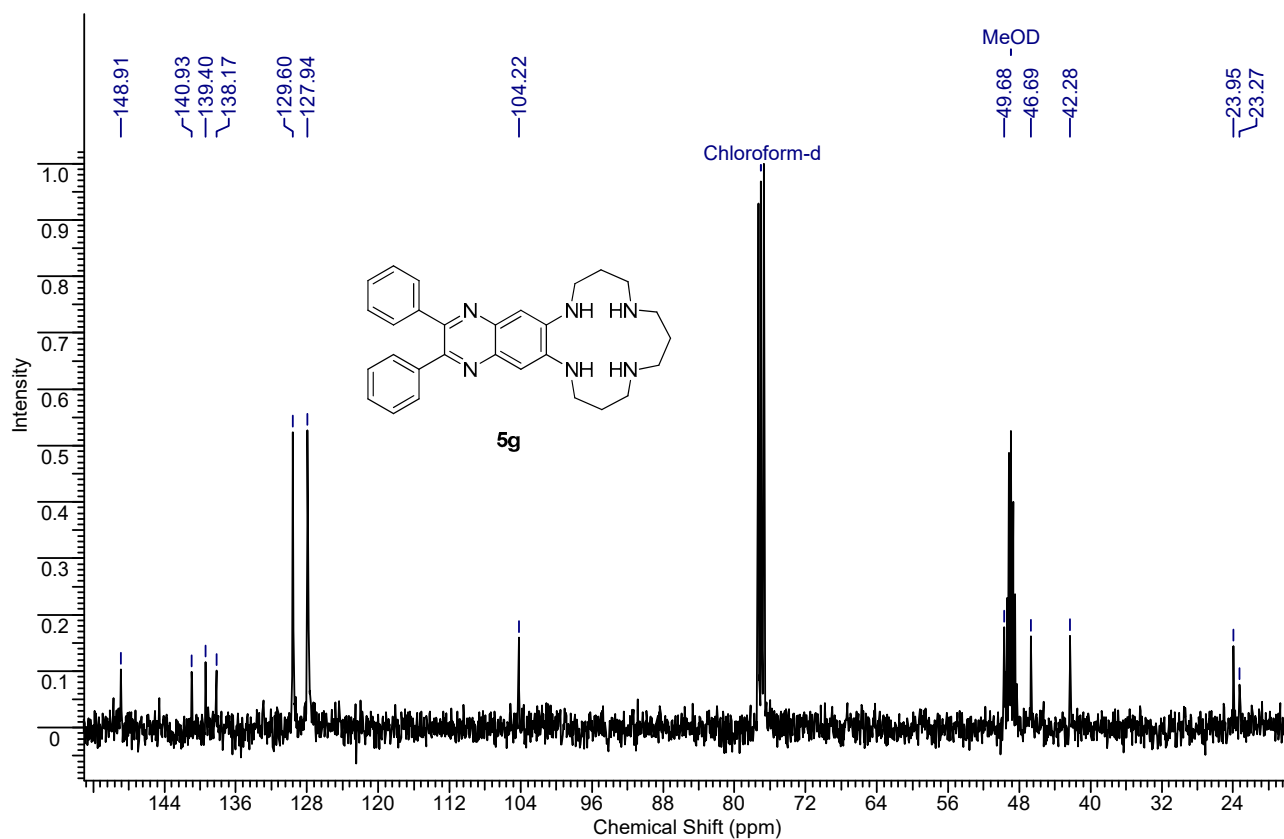

**Figure S62.** <sup>13</sup>C NMR spectrum of the compound **5g** (CDCl<sub>3</sub>/CD<sub>3</sub>OD, 5:1 v/v, 100.6 MHz, 300 K).



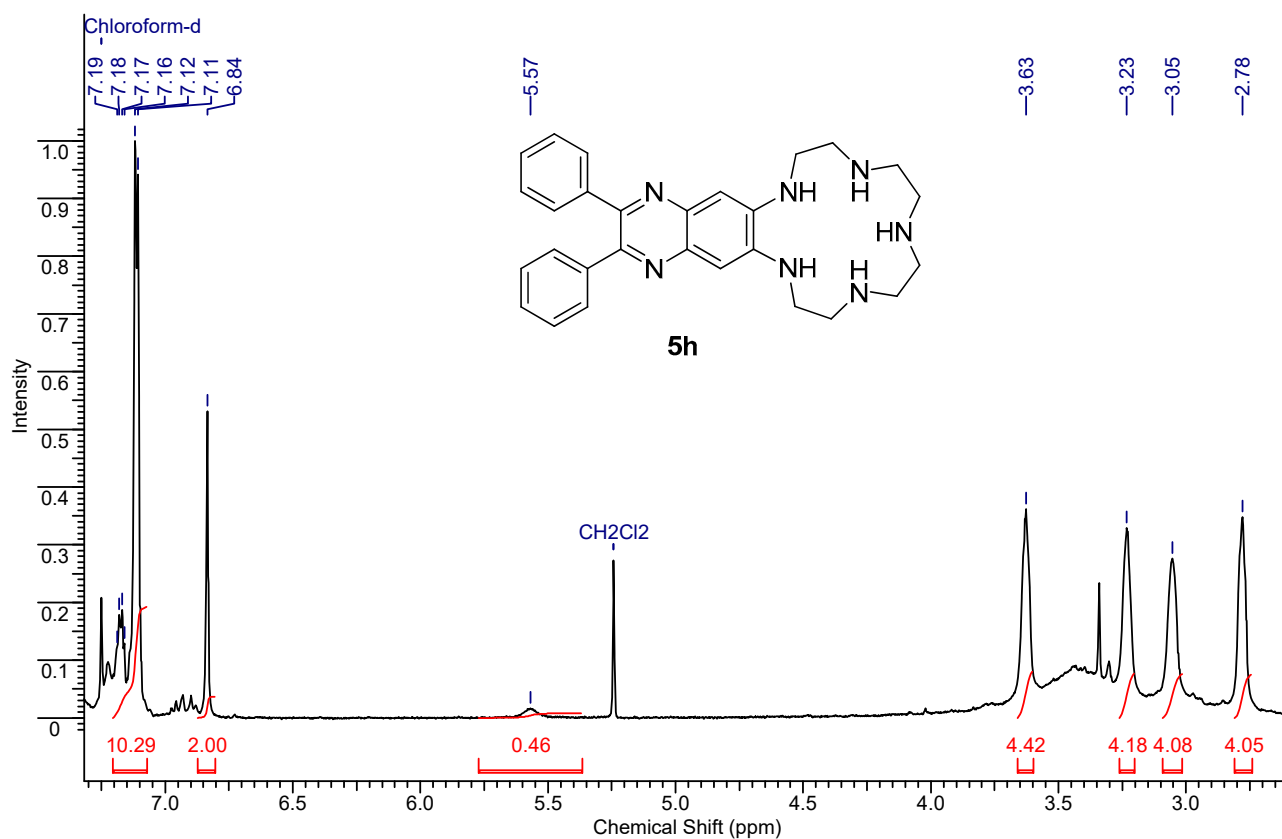

**Figure S63.** <sup>1</sup>H NMR spectrum of the compound **5h** (CDCl<sub>3</sub>/CD<sub>3</sub>OD, 10:1 v/v, 400 MHz, 300 K).

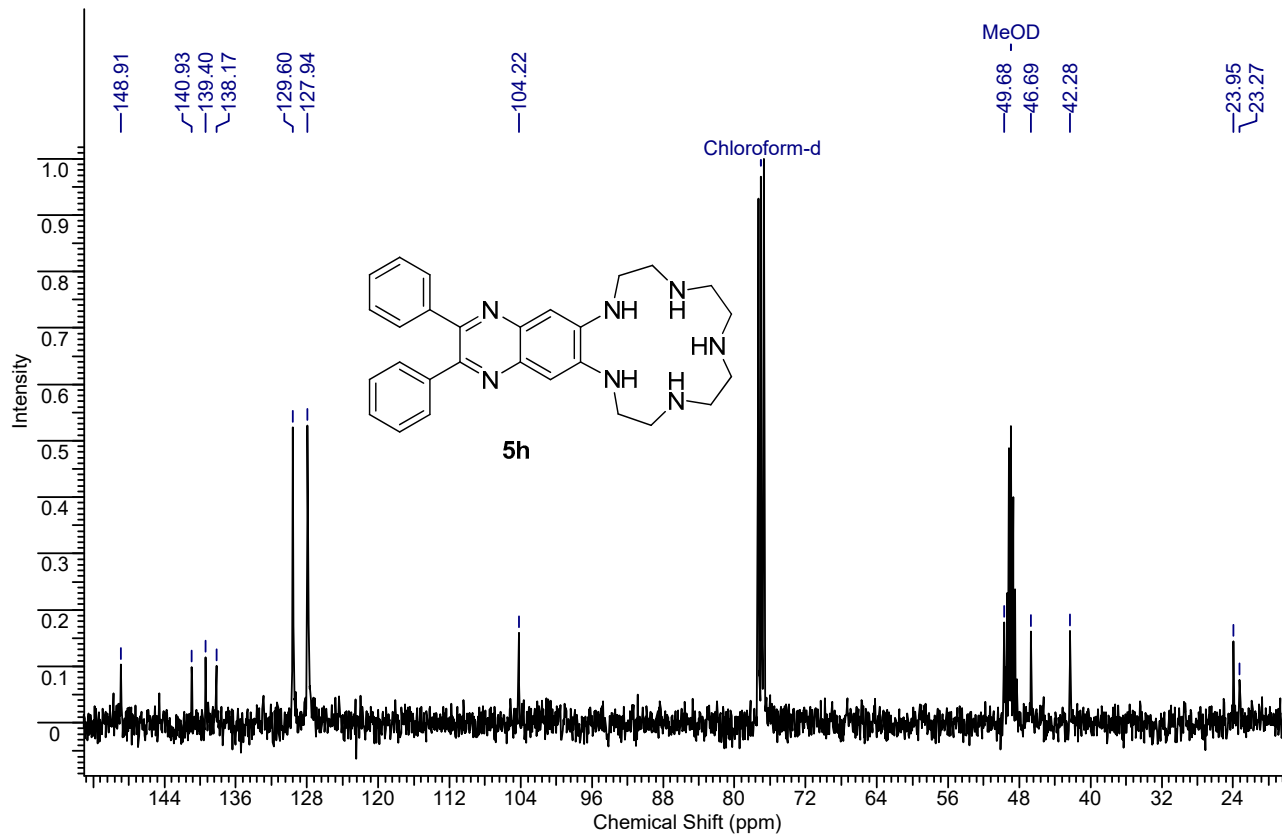

**Figure S64.** <sup>13</sup>C NMR of the compound **5h** (CDCl<sub>3</sub>/CD<sub>3</sub>OD, 10:1 v/v, 100.6 MHz, 300 K).

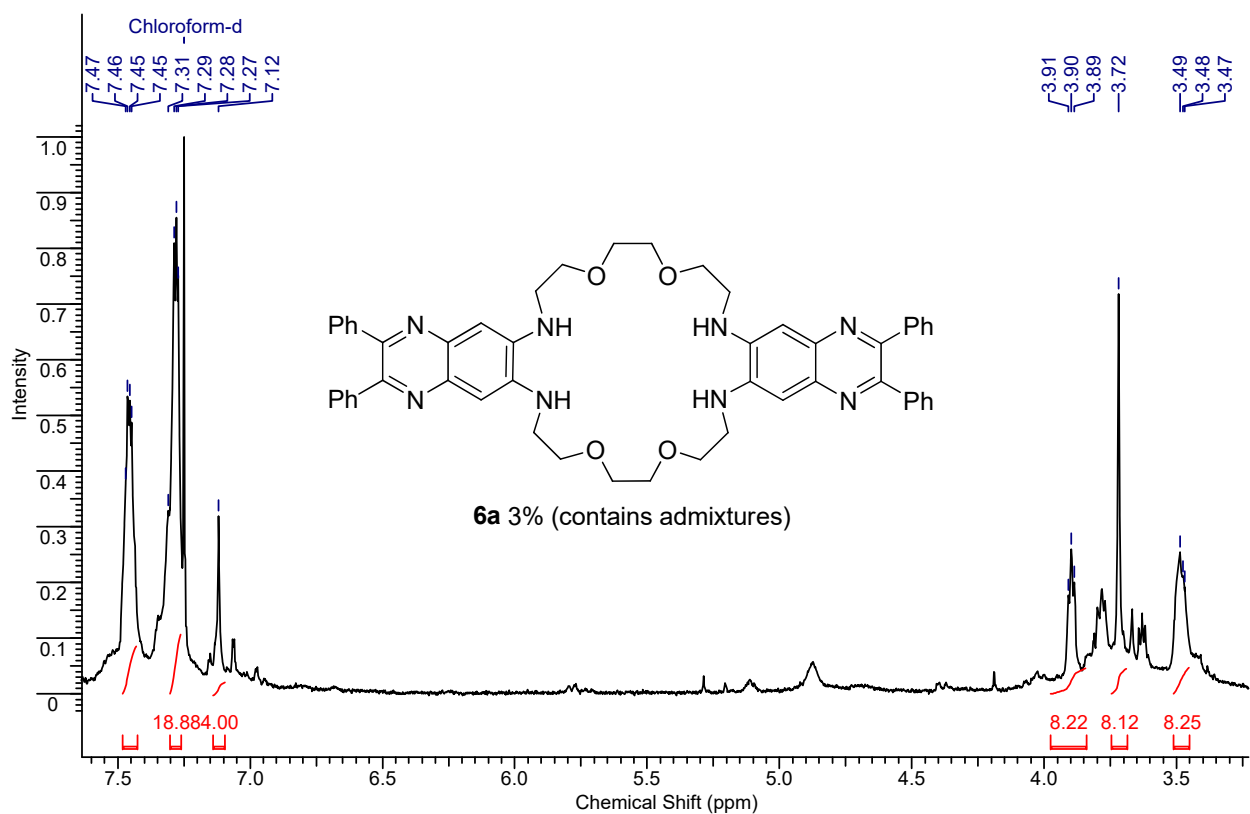

**Figure S65.** <sup>1</sup>H NMR spectrum of the compound **6a** (contains admixtures **5a**), (CDCl<sub>3</sub>, 400 MHz, 300 K).

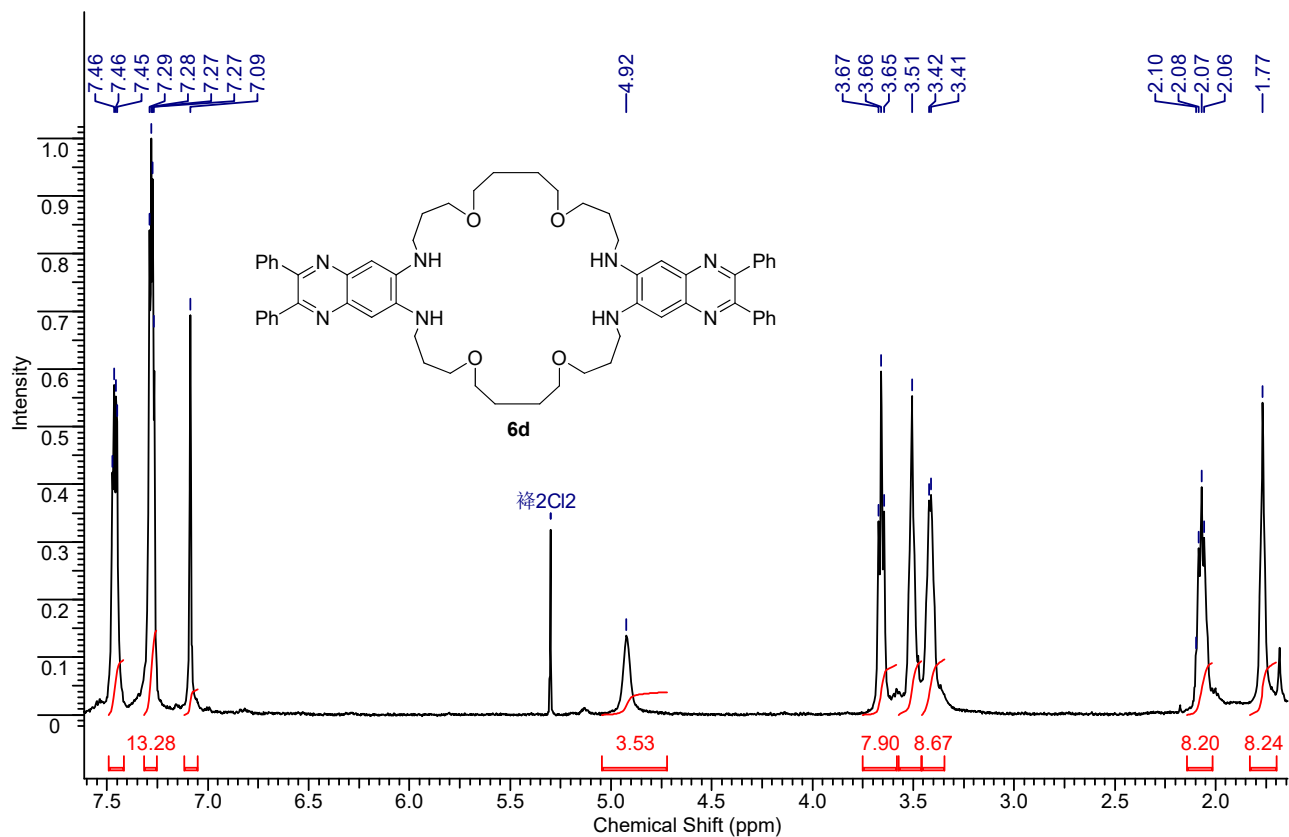

**Figure S66.** <sup>1</sup>H NMR spectrum of the compound **6d** (CDCl<sub>3</sub>, 400 MHz, 300 K).

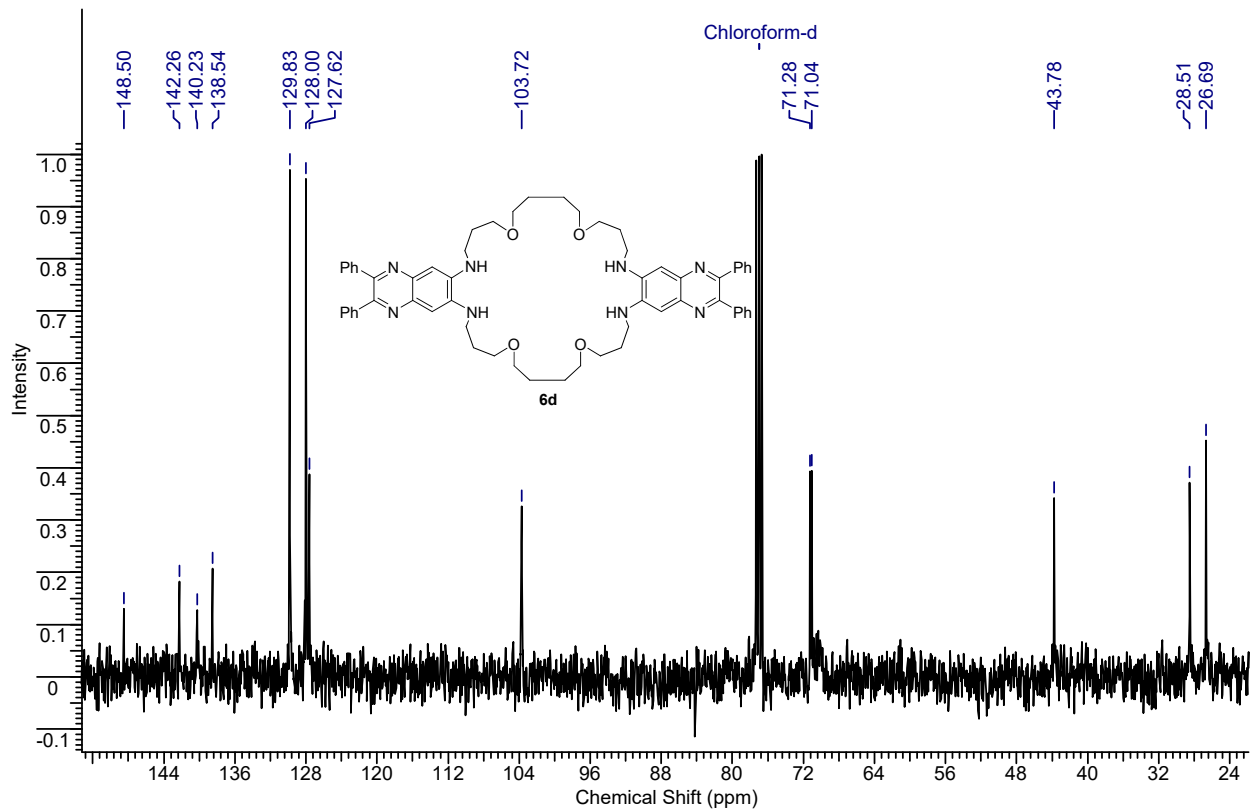

**Figure S67.** <sup>13</sup>C NMR spectrum of the compound **6d** (CDCl<sub>3</sub>, 100.6 MHz, 300 K).

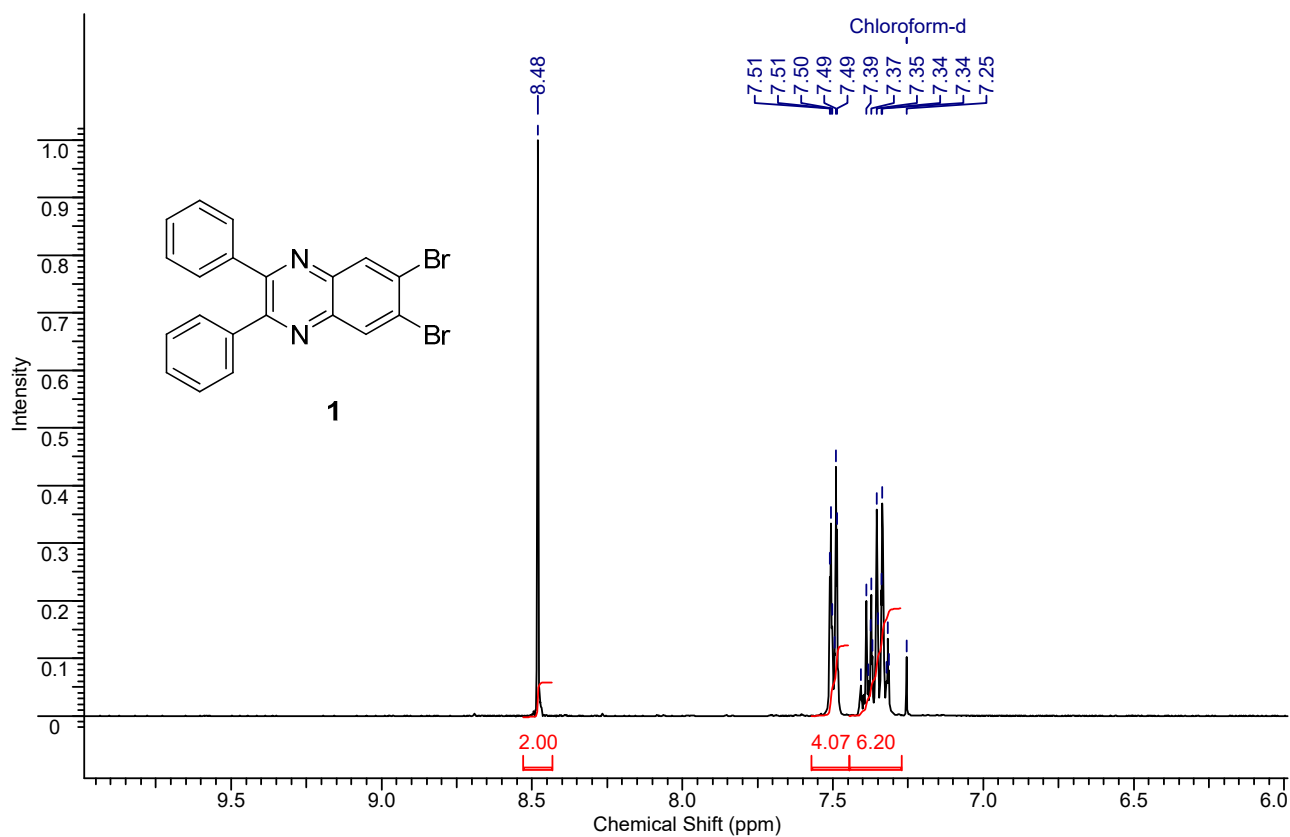

**Figure S68.** <sup>1</sup>H NMR spectrum of the compound **1** (CDCl<sub>3</sub>, 400 MHz, 300 K).

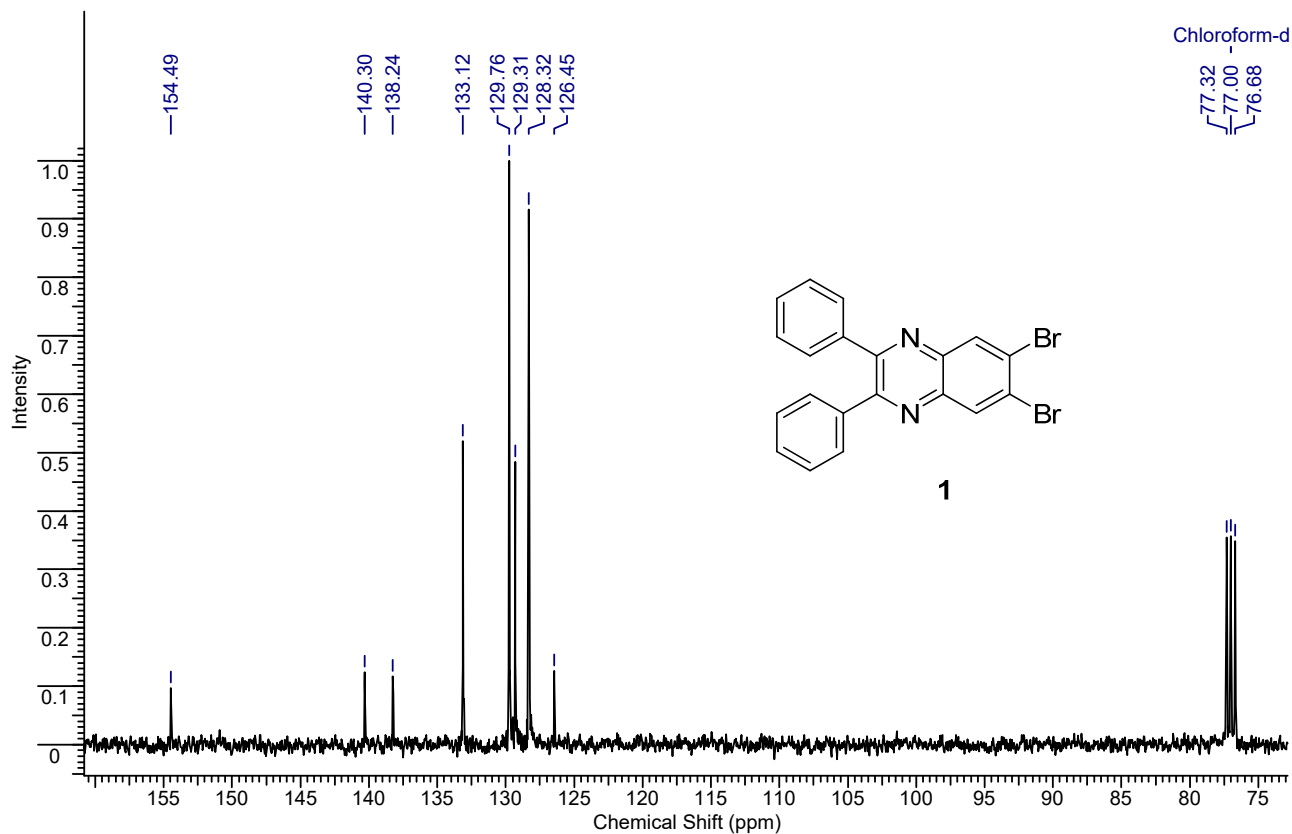

**Figure S69.**  $^{13}\text{C}$  NMR spectrum of the compound **1** ( $\text{CDCl}_3$ , 100.6 MHz, 300 K).

## 6. References

1. Wong, K.-L.; Bünzli, J.-C.G.; Tanner, P.A. Quantum yield and brightness. *J. Lumin.* **2020**, *224*, 117256, doi:10.1016/j.jlumin.2020.117256.
2. Gans, P.; Sabatini, A.; Vacca, A. Investigation of equilibria in solution. Determination of equilibrium constants with the HYPERQUAD suite of programs. *Talanta* **1996**, *43*, 1739–1753, doi:10.1016/0039-9140(96)01958-3.
